# 1 Neural divergence and convergence for interoceptive and 2 somatosensory attention and detection

3 Aleksandra M. Herman<sup>1,\*</sup>, Clare Palmer<sup>2,\*</sup>, Ruben T. Azevedo<sup>3</sup>, Manos Tsakiris<sup>1,4,5</sup>

4 <sup>1</sup> Lab of Action and Body, Department of Psychology, Royal Holloway, University of London, UK

5 <sup>2</sup> ABCD Coordinating Center, Center for Human Development (CHD), University of California San  
6 Diego, US

7 <sup>3</sup> School of Psychology, University of Kent, Canterbury, UK

8 <sup>4</sup> The Warburg Institute, School of Advanced Study, University of London, UK

9 <sup>5</sup> Department of Behavioural and Cognitive Sciences, Faculty of Humanities, Education and Social  
10 Sciences, University of Luxembourg, Luxembourg

11 \*These authors declare equal contributions to first authorship.

## 1 Abstract

2 Body awareness is constructed by signals originating from within and outside the body. How do  
3 these apparently divergent signals converge? We developed a signal detection task to study the  
4 neural convergence and divergence of interoceptive and somatosensory signals. Participants focused  
5 on either cardiac or tactile events and reported their presence or absence. Beyond some evidence of  
6 divergence, we observed a robust overlap in the pattern of activation evoked across both conditions  
7 in frontal areas including the insular cortex, as well as parietal and occipital areas, and for both  
8 attention and detection of these signals. Psycho-physiological interaction analysis revealed that right  
9 insular cortex connectivity was modulated by the conscious detection of both types of sensations,  
10 but with greater connectivity to occipito-parietal regions when attending to cardiac signals. Our  
11 findings speak in favour of the inherent convergence of bodily-related signals and move beyond the  
12 apparent antagonism between exteroception and interoception.

## 1 Introduction

2 Bodily self-consciousness depends on the perception and awareness of bodily signals. It is a  
3 multidimensional concept including identification with one's body (i.e. body-ownership), self-  
4 location of body and body parts in space, and the first-person perspective (Blanke, 2012; Park &  
5 Blanke, 2019). Although we tend to take the ability to become aware of and identify with our body  
6 for granted, bodily self-consciousness can be easily malleable as it relies on the brain's ability to  
7 integrate online information about the body originating from different sensory modalities (Aspell,  
8 Lenggenhager, & Blanke, 2012; Ehrsson, 2012; Park & Blanke, 2019; Sel, Azevedo, & Tsakiris, 2017; K.  
9 Suzuki, Garfinkel, Critchley, & Seth, 2013; Tsakiris, 2010; Tsakiris & Haggard, 2005). Importantly, at  
10 any given moment in time during wakefulness the brain integrates interoceptive (i.e. internal  
11 sensory information originating from visceral organs signalling the internal state of the body),  
12 exteroceptive (i.e. sensory information provided by touch, vision, and audition) and proprioceptive  
13 information (originating from receptors in muscles and ligaments signalling the position of body  
14 parts in space).

15 To give an example that illustrates the cross-talk between sensory modalities and their importance  
16 for bodily self-consciousness, consider the Rubber Hand Illusion (RHI) where synchronous  
17 exteroceptive visuo-tactile stimulation between a rubber hand and the participant's hidden hand  
18 typically results in subjective feelings of ownership for the rubber hand (Botvinick & Cohen, 1998).  
19 An important behavioural outcome of the RHI is a change in proprioception, that is, in the felt  
20 location of the participant's real hand. More recent studies have also shown how interoceptive  
21 signals also contribute to the experience of body-ownership. Participants with lower interoceptive  
22 accuracy, as measured by the heartbeat counting task (Schandry, 1981), report a greater subjective  
23 experience of the illusion, compared to individuals with higher interoceptive accuracy (Tsakiris,  
24 Tajadura-Jiménez, & Costantini, 2011). Interoceptive inputs during the task also affect the illusion,  
25 for example, visual feedback of participant's own heartbeats, increased self-identification with the  
26 virtual body (Aspell et al., 2013; K. Suzuki et al., 2013). Similarly, synchronous affective touch, an  
27 interoceptive modality of affective and social significance, increases the experience of the illusion  
28 (Crucianelli, Krahé, Jenkinson, & Fotopoulou, 2018). Therefore, higher interoceptive accuracy (i.e.  
29 better ability to feel internal bodily sensations) makes one less susceptible to embody foreign  
30 objects, while simultaneous visual feedback of one's heartbeat or affective touch, helps to accept  
31 such objects as part of one's body.

32 Therefore, given the importance of interoceptive, proprioceptive, and exteroceptive inputs for body-  
33 representation (Ponzo, Kirsch, Fotopoulou, & Jenkinson, 2018; Stone, Keizer, & Dijkerman, 2018;  
34 Tsakiris, 2010; Tsakiris et al., 2011), embodiment and self-conscious awareness (Arzy, Thut, Mohr,  
35 Michel, & Blanke, 2006; Lou et al., 2004), it is crucial to understand how such sensory information  
36 are processed in divergent or convergent ways in the brain and are brought to awareness.

37 Past neuroimaging research on the neural correlates of interoception has primarily assessed  
38 attention to cardiac activity (Avery et al., 2014; Caseras et al., 2013; Critchley, Wiens, Rotshtein,  
39 Ohman, & Dolan, 2004; Kuehn, Mueller, Lohmann, & Schuetz-Bosbach, 2016; Pollatos, Schandry,  
40 Auer, & Kaufmann, 2007a; Simmons et al., 2013; Stern et al., 2017; Wiebking et al., 2010; Wiebking  
41 & Northoff, 2015; Zaki, Davis, & Ochsner, 2012a), with a growing interest in respiratory-focused  
42 interoception (Farb, Segal, & Anderson, 2013; Wang et al., 2019) and sensations from the gut  
43 (Simmons et al., 2013). Typically, in these studies an interoceptive condition (sensing the internal  
44 state of the body; Craig, 2002) is contrasted against an exteroceptive condition (sampling the  
45 external world) using, for example, auditory (Caseras et al., 2013; Critchley et al., 2004; Kuehn et al.,  
46 2016; Pollatos, Schandry, Auer, & Kaufmann, 2007b; Wiebking et al., 2010; Wiebking & Northoff,

1 2015; Zaki et al., 2012a) or visual stimuli (Avery et al., 2014; Simmons et al., 2013; Stern et al., 2017;  
2 Wang et al., 2019). Across these studies we observe very similar activation patterns for interoceptive  
3 vs control contrasts, pointing to increased activation of several cortical regions including the insular  
4 cortex, sensorimotor regions (postcentral gyrus, inferior parietal lobule, paracentral lobule,  
5 precentral gyrus, supplementary motor area) as well as occipital and temporal cortices, anterior  
6 cingulate, and lateral prefrontal regions during interoceptive condition. The insular cortex,  
7 particularly the right anterior insular cortex, is considered the main hub of the interoceptive network  
8 (A. D. (Bud) Craig, 2009; A. D. Craig, 2002; Critchley et al., 2004). A small meta-analysis on  
9 cardioception revealed that attention to heartbeats relative to exteroceptive attention most  
10 consistently activates bilateral insula as well as premotor regions (Schulz, 2016).

11 However, the boundary of interoceptive sensations becomes less clear when considering more  
12 proximal senses such as touch or proprioception, as opposed to more distal senses such as vision  
13 and audition. Considering the question of bodily self-consciousness, somatosensory and  
14 proprioceptive signals are thought to be experientially self-specific (i.e. they concern one's own  
15 body) in ways that vision and audition are not. Beyond the phenomenal experience, different types  
16 of tactile signals are transmitted through proprioceptive, exteroceptive and interoceptive pathways  
17 (Liljenkrantz & Olausson, 2014; Olausson et al., 2008; Roudaut et al., 2012). Various receptors and  
18 afferent fibres are engaged in tactile stimuli detection and transmission (Roudaut et al., 2012). For  
19 example, Ruffini corpuscles located in dermis detect skin stretch and movement direction, while  
20 Pacinian corpuscles detect vibration. Vibrotactile stimulation elicits activation of primary and  
21 secondary somatosensory cortex as well as insula and thalamus (e.g., Briggs et al., 2004;  
22 Chakravarty, Rosa-Neto, Broadbent, Evans, & Collins, 2009; Chang et al., 2009; Golaszewski et al.,  
23 2006; Nelson, Staines, Graham, & McIlroy, 2004). Affective touch, which conveys emotionally-valent  
24 information through low mechanical threshold unmyelinated C fibres, also projects to the insula  
25 (Björnsdotter, Morrison, & Olausson, 2010; Liljenkrantz & Olausson, 2014; Olausson et al., 2008,  
26 2002). Therefore, considering a more proximal sense such as somatosensation alongside  
27 interoceptive processing might lead to novel insights regarding how these two sides of embodiment  
28 converge or diverge in the brain.

29 Indeed, a recent meta-analysis of 40 studies assessed the neural networks associated with  
30 perception of bodily sensations: those coming from inside the body (i.e. interoceptive) as well as  
31 externally to the body (e.g. rubber hand illusion, body ownership, self-location studies) (Salvato,  
32 Richter, Sedeño, Bottini, & Paulesu, 2019). A variety of interoceptive channels besides cardioception  
33 were investigated, including sensations such as thirst, air-hunger, attention to spontaneous bodily  
34 sensations, affective touch, and gastric balloon distension. Interestingly, processing of stimuli of the  
35 two domains converged primarily in the supramarginal gyrus, the right precentral, postcentral, and  
36 superior temporal gyri. Therefore, overlapping neural networks are engaged in interoceptive and  
37 exteroceptive body-related processing contributing to the creation of a multidimensional  
38 representation of the bodily self (Salvato et al., 2019). Yet, to our knowledge, a comprehensive study  
39 looking at a direct comparison between attention to and perception of interoceptive and  
40 somatosensory sensations is missing.

41 Noteworthy, so far neuroimaging studies investigating the neural correlates of interoceptive  
42 processing have primarily focused on aspects of *interoceptive attention*, that is the ability to direct  
43 attentional resources towards the source of internal body sensations (Khalsa et al., 2018). Our  
44 knowledge of neural processes engaged in *interoceptive detection*, defined as the ability to  
45 consciously detect the presence or absence of a stimulus (Khalsa et al., 2018), is limited despite the  
46 growing evidence of the importance of interoceptive accuracy as well as preconscious impact of

1 afferent signals in behaviour and cognition (Critchley & Garfinkel, 2017; Garfinkel & Critchley, 2016;  
2 Quadt, Critchley, & Garfinkel, 2018). In exteroceptive domains, a meta-analysis (Meneguzzo, Tsakiris,  
3 Schioth, Stein, & Brooks, 2014) of neuroimaging studies comparing neural correlates of supra- vs  
4 subliminal presentation of the same modality (visual, auditory, or tactile) revealed that conscious  
5 detection of the exteroceptive stimuli was associated with greater activity in left anterior cingulate  
6 cortex and mid-caudal anterior cingulate cortex. Subliminal presentation (i.e. non-conscious  
7 perception), on the other hand, evoked consistently greater activations in the right fusiform  
8 gyrus/middle occipital gyrus, right caudal anterior cingulate cortex and right insula. Therefore,  
9 anterior cingulate cortex was most consistently activated in response to both subliminal and  
10 supraliminal stimuli presentation, presumably playing a role in integration of conscious and non-  
11 conscious processing (Meneguzzo et al., 2014). In the interoceptive domain, Critchley and colleagues  
12 (Critchley et al., 2004) utilised a heartbeat discrimination task (Whitehead, Drescher, Heiman, &  
13 Blackwell, 1977), whereby participants are asked to judge whether a series of tones is presented in  
14 sync with one's heartbeats (presented at cardiac systole) or delayed (presented at cardiac diastole).  
15 This task involves correct detection of internal signals (heartbeats) and an ability to differentiate  
16 them from external stimuli (tones). However, the exteroceptive control task is different: participants  
17 need to judge whether all tones in a series are the same or whether one is different (odd-one-out).  
18 Thus, these tasks likely involve different processes. Moreover, using these tasks, we cannot  
19 differentiate between neural activation when attending to vs conscious detection of a stimulus.  
20 Investigating the neural correlates of conscious detection of heartbeats requires the use of a task  
21 that allows to reliably dissociate between instances of detected and attended but not detected  
22 heartbeats.

23 Motivated by recent neurocognitive models of bodily self-consciousness (Blanke, 2012; A. D. Craig,  
24 2009; Tsakiris, 2017) and the existing literature on how somatosensation and interoception are  
25 cortically represented (Salvato et al., 2019), we set out to investigate the potentially divergent and  
26 convergent ways in which attention to and detection of somatosensory and interoceptive signals are  
27 processed. Thus, the aim of the current study was to identify and compare the neural correlates of  
28 directed attention as well as conscious and non-conscious perception of heartbeats and tactile  
29 (somatosensory) stimuli. To do this we employed an MRI compatible ECG system in order to  
30 accurately align heartbeats to the fMRI signal and designed a novel Heartbeat/Somatosensory  
31 Detection task in order to dissociate between felt and not felt stimuli during an fMRI scan. We tested  
32 three hypotheses: (1) interoceptive and somatosensory *attention* would yield overlapping but  
33 dissociable activation patterns across the brain (e.g. insula cortex, somatomotor cortex, and  
34 thalamus); (2) conscious *detection* of interoceptive and somatosensory sensations would yield  
35 overlapping, but dissociable activation patterns across the brain; and (3) as the central hub of the  
36 interoceptive network (A. D. Craig, 2002; Critchley et al., 2004), but also a crucial part of the  
37 cognitive-control and salience processing network (Jiang, Beck, Heller, & Egner, 2015; Uddin, 2015;  
38 Wang et al., 2019), functional connectivity with the right insular cortex would be modulated by  
39 conscious detection of stimuli across interoceptive and somatosensory conditions. Thus, our study  
40 goes beyond past investigations as it addresses the independence and overlap of directed attention  
41 to interoceptive and somatosensory cues, as well as contrasting the neural correlates of conscious  
42 and non-conscious processing of these stimuli.

43

## 1 Methods

### 2 Participants

3 38 participants in total (aged 19-52,  $26.4 \pm 6.94$ ; 16 males) were recruited for the study and  
4 completed a first behavioural screening session. Participants were selected for the MRI scan based  
5 on their ability to subjectively feel their heartbeats in the Heartbeat Detection Task (see below).  
6 Participants completed a practise version, with 2 blocks of 20 trials each, of the experimental task to  
7 be carried out in the scanner in the behavioural screening session. Only those who felt their  
8 heartbeat on 40-80% of trials were invited to participate in the MRI session. This screening  
9 procedure ensured that participants scanned would have a distribution of both detected and un-  
10 detected heartbeats. Thirty participants (aged 19-52,  $26.83 \pm 6.82$ ; 12 males) passed the screening  
11 and completed the MRI scan on a different day. The sample size was estimated based on previous  
12 research employing cardioceptive tasks in the fMRI environment (Farb et al., 2013; Stern et al., 2017;  
13 Wiebking et al., 2011). All participants provided written informed consent in line with the Local  
14 Ethics Committee Regulations and MRI Safety Procedures. At the time of testing, none of the  
15 participants were taking any medication for a neurological or psychological disorder or showed any  
16 MRI contradictions. Participant were asked to refrain from taking any caffeine three hours before  
17 the MRI scan.

18 As two individuals were removed from the analysis entirely due to poor ECG quality during MRI  
19 session, the final sample consisted of 28 participants. 25 of them had complete datasets (8 blocks),  
20 while the remaining three had seven blocks only, due to poor ECG quality or excessive motion (see  
21 above for details).

### 22 Experimental Design

#### 23 Heartbeat and Somatosensory Detection Task

24 Participants completed a novel Heartbeat and Vibrotactile Detection Task in the MRI scanner. The  
25 task was programmed in Cogent toolbox (Wellcome Dept., London, UK) for MATLAB 2015b  
26 (Mathworks Inc.). The experimental task was divided into two block types: heartbeat detection and  
27 somatosensory detection. At the beginning of each block, participants were instructed to either  
28 focus on their heart beating or detect a faint vibration presented on their left hand. The vibrotactile  
29 stimulator was secured to the skin above the first dorsal interosseous. The somatosensory stimuli,  
30 with a sinusoidal wave form of adjustable amplitude and of 150ms in duration, were delivered using  
31 MRI-compatible pneumatic vibrotactile device (dual channel vibrotactile transducer with MRI  
32 compatible tactile transducer system). On each trial, participants were presented with a black  
33 fixation cross for a pseudorandomised inter-trial interval (ITI) of 4, 6 or 8 seconds. Each trial  
34 consisted of three epochs, whereby the fixation cross changed colour from red to green to blue  
35 (750ms each) followed by a response screen (see Fig 1 for a schematic). Participants were instructed  
36 to press the button corresponding to the colour of the cross during which they felt a target sensation  
37 (heartbeat or somatosensory). It was emphasised that they should take a conservative approach and  
38 provide a button press when they actually felt the sensation, i.e. not to guess on any instance, but  
39 also that they could press multiple buttons depending on when they felt a stimulus. If they did not  
40 feel anything, they pressed the "NO" button. This ensured a button was pressed following every  
41 trial. Another response screen followed, during which participants rated their confidence in the  
42 response on a scale of 1-4. If participants indicated that they felt a stimulus, the response screen  
43 asked how confident participants were that they had felt a stimulus; however, if participants  
44 indicated that they did not feel a stimulus, the response screen asked how confident participants

- 1 were that they had not felt a stimulus. Both response screens were presented for a fixed time of
- 2 2500ms. This was to ensure that trials remained as consistent as possible across conditions.

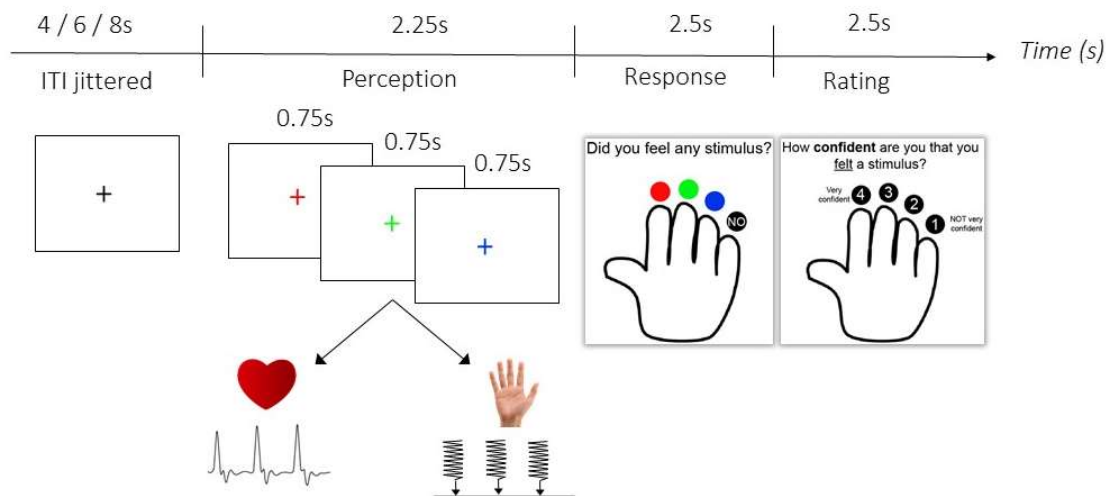

3  
4 *Figure 1 Heartbeat and Somatosensory Detection Task schematic.*

5 Importantly, as participants' hearts were beating continuously throughout the experiment, to  
6 maintain exactly the same sensory stimulation between conditions, somatosensory stimuli were also  
7 presented on the left hand continuously throughout all blocks. The inter-stimulus interval (ISI) was  
8 set to match the participants' heart rate as closely as possible and some pseudorandomised  
9 variation was added to the ISI between 0 and 90ms to ensure this did not become too predictable  
10 and mirror typical heart-rate variability. To maximise the match between the conditions, the  
11 intensity of stimuli presentation was set to just below the individual somatosensory perception  
12 threshold (see below) with some occasional fluctuations above the threshold. Participants  
13 completed 8 blocks in total (4 of heartbeat detection and 4 of somatosensory detection) with 20  
14 trials per block (60 epochs). The block type was alternated with the order counterbalanced across  
15 participants.

#### 16 [Somatosensory Thresholding Procedure](#)

17 Before starting the main task, participants completed a thresholding task to calibrate the intensity of  
18 the somatosensory stimulation. The task was programmed using the Quest toolbox in MATLAB  
19 2015b. The task was exactly the same as the main task (to allow sufficient practise on the task),  
20 however, only a single somatosensory stimulus was presented on each trial and participants  
21 reported when they felt it. The intensity of the somatosensory stimulus was altered on each trial to  
22 find a threshold in which participants could feel the stimulus 60% of the time. Throughout  
23 somatosensory detection blocks in the MRI scanner, the intensity of the somatosensory stimulus  
24 was monitored and modulated online using a staircase procedure to ensure that participants'  
25 somatosensory detection was roughly at 50% in each block.

#### 26 [Heartbeat Counting Task](#)

27 During the behavioural screening session participants completed the heartbeat counting task  
28 (Schandry, 1981). Participants were asked to count how many heartbeats they could feel in a given  
29 period (25s, 30s, 35s, 40s, 45s, ad 50s, in a randomised order). The instructions were as follows:  
30 "Please sit back and relax and try to feel your heart beating in your chest. When you hear the start  
31 signal (auditory beep) please start counting your heartbeats and stop when you hear the stop signal  
32 (auditory beep). You can have your eyes open or closed during the task." After inputting the number

1 of heartbeats counted on each trial, participants rated how confident they were in their answer on a  
2 scale of 0-100. Participants completed six trials.

3 The dependent variable of the heartbeat counting task is the interoceptive accuracy (IAcc) score,  
4 which serves as an objective measure of how well an individual can feel their heart beating  
5 (Schandry, 1981). IAcc is calculated by determining the proportion of counted heartbeats over actual  
6 heartbeats on each trial and then averaging this over trials and deducting from 1 using the following  
7 formula:  $1 - [(\sum(\text{counted beats} / \text{actual beats})) / N]$ , where 'N' equals number of trials.

## 8 Data collection

9 All MRI data was collected in a Siemens Magnetom TrioTim syngo MR B17 3-Tesla scanner (Siemens  
10 AG, Munich, Germany) at the CUBIC imaging centre at Royal Holloway, University of London.

11 First, structural volumes were obtained using the high-resolution three-dimensional magnetization  
12 rapid acquisition gradient echo sequence. Next, whole-brain multiband gradient echo echo-planar  
13 imaging (EPI) sensitive to blood oxygenation–level dependent signal was used to collect fMRI data  
14 (multiband acceleration factor = 2, TR = 1100 ms, TE = 30 ms, FA = 76°, 32 slices, FoV = 192 mm,  
15 voxel size = 3 x 3 x 3 mm, 5:03 min/block). After 4 blocks of the task, whilst participants rested, a  
16 fieldmap was acquired using the same resolution and slice locations as multiband images, to allow  
17 for offline correction of field inhomogeneities (TR = 525 ms, TE = 5.19/7.65 ms, FA = 60°, 1:10 min).

18 Throughout the MRI scan, we collected electrocardiogram (ECG) data using MRI compatible ECG  
19 electrodes and leads (BIOPAC). These were configured in a tight right-angled triangle on the left side  
20 of the chest. The skin was scrubbed using an abrasive cloth and prepped using Nuprep Skin Prep Gel  
21 (D.O. WEAVER and COMPANY) before the electrodes were attached. The ECG signal was recorded  
22 with a Powerlab 8/35 box (Bio Amp 132) and LabChart 8 software ([www.adinstruments.com](http://www.adinstruments.com)).

## 23 Data Analysis

### 24 ECG data

25 Due to the artefacts from the EPI sequence, the ECG data required a large amount of preprocessing  
26 to extract timing of each R peak during the task. This was completed using in-built functions within  
27 Acqknowledge software (BIOPAC). The ECG data was filtered sequentially at 50Hz and 14.54Hz (EPI  
28 scanner frequency) using a comb band stop filter. A window of 600-900ms (depending on heart rate)  
29 was selected around heartbeats prior to the start of the EPI sequence. These epochs were averaged  
30 to create a QRS template. A normalised cross-correlation then correlated this template with the  
31 whole ECG timeseries in an overlapping sliding window. Peaks greater than 0.5 correlation were  
32 detected and labelled as QRS complexes then superimposed onto the filtered ECG trace. Each  
33 timeseries was then visually inspected and any missed or incorrectly labelled QRS peaks were  
34 manually edited.

35 The ECG quality was insufficiently good for two participants to reliably establish timing of the R-  
36 peaks; therefore, data from these two individuals was excluded from the analysis entirely. For an  
37 additional two participants, the ECG quality was poor for one of the Heart blocks; these blocks were  
38 also removed from the further analysis.

### 39 Behavioural Data Analysis

40 The main dependent variable for the experimental task in the scanner was the participants' response  
41 of feeling or not feeling the stimuli. For each trial, each coloured cross was treated as a separate  
42 epoch creating 60 epochs per block (20 trials). As per signal detection theory, each epoch was  
43 categorised as either a Hit, Miss, False Alarm or Correct Rejection depending on whether the



1 participant indicated that they felt or did not feel a sensation during each epoch and whether the  
2 heartbeat or somatosensory stimulus was present or absent. To quantify the performance, we  
3 calculated an accuracy score [ $\text{Accuracy} = (N_{\text{Hits}} + N_{\text{Correct rejections}}) / N_{\text{epochs}}$ ] for each block and condition.  
4 For completeness, we also calculated  $d'$  as a signal detection theory index of individual sensitivity to  
5 heartbeats and somatosensory stimuli.  $D'$  was calculated taking all trials into account for Cardiac and  
6 Somatosensory Focus conditions separately. The performance on the task was analysed using a 2  
7 (Cardiac vs Somatosensory condition) by 4 (blocks) repeated measures analysis of variance  
8 (rmANOVA) or paired-samples  $t$ -test, as appropriate, conducted in R implemented in R Studio (R  
9 Studio Team, 2016).

## 10 MRI Data

11 fMRI data pre-processing and analyses were carried out using FEAT (fMRI Expert Analysis Tool)  
12 Version 6.00, part of FSL (FMRIB's Software Library; Jenkinson, Beckmann, Behrens, Woolrich, &  
13 Smith, 2012).

## 14 PRE-PROCESSING

15 Pre-processing steps included skull stripping of structural images with Brain Extraction Tool (BET;  
16 Smith, 2002), removal of the first four functional volumes to allow for signal equilibration, head  
17 movement correction by volume-realignment to the middle volume using MCFLIRT (Jenkinson,  
18 Bannister, Brady, & Smith, 2002), global 4D mean intensity normalization, spatial smoothing using a  
19 Gaussian kernel of FWHM 6mm, grand-mean intensity normalisation, high pass temporal filtering  
20 (Gaussian-weighted least-squares straight line fitting, with  $\sigma=50.0s$ ) and fieldmap based  
21 distortion correction. Participants' motion was minimal and did not exceed 3 mm (1 voxel) with the  
22 exception of a single Heart Focus block for one of the participants where movement spikes exceeded  
23 this threshold. This run was, therefore, excluded from further fMRI analysis. Registration to high  
24 resolution structural images was carried out using FLIRT (Jenkinson et al., 2002; Jenkinson & Smith,  
25 2001). Registration from high resolution structural to MNI152 standard space was then further  
26 refined using FNIRT nonlinear registration (Andersson, Jenkinson, & Smith, 2010).

## 27 UNIVARIATE ANALYSIS

28 Time-series statistical analysis was carried out using FILM with local autocorrelation correction  
29 (Woolrich, Ripley, Brady, & Smith, 2001). In the first-level modelling, customized square waveforms  
30 representing each event type and the duration of stimulus presentation were convolved with a  
31 double-gamma hemodynamic response function and a high pass filter was applied to remove low-  
32 frequency artefacts. Two separate analyses were performed. To investigate the neural correlates  
33 underlying heart- and somatosensory-focused attention, we modelled the general attention to  
34 heartbeats/somatosensory stimuli, taking into account the whole duration of  
35 Cardiac/Somatosensory Focus trial (2.25s). To investigate the neural correlates of conscious and  
36 non-conscious detection of these sensations, we separated the individual epochs (0.75s in duration  
37 each), and categorised them as either a Hit, Miss, False Alarm or Correct Rejection, to match the  
38 behavioural analysis. In both types of analysis, the events were modelled at the onset of fixation  
39 crosses as well as onset of the response screens. The button press onsets as well as response screen  
40 and confidence screen were additionally included as regressors of no interest.

41 Next, we estimated each participant's mean neural response during Cardiac/Somatosensory Focus  
42 (focus analysis) or Hits and Misses for Cardiac and Somatosensory conditions separately (conscious  
43 detection analysis). To this end, for each first-level FEAT output, the four blocks for respective  
44 condition were combined for each participant using a second-level fixed effects GLM to create  
45 averaged maps.

1 To identify brain regions recruited more in response to Cardiac relative to Somatosensory condition,  
2 a third-level whole brain voxel-wise GLM was conducted across all participants for each of the  
3 (second-level) contrasts of interest. This between-subject analysis was carried out using the FMRIB  
4 Local Analysis of Mixed Effects (FLAME; Woolrich, Behrens, Beckmann, Jenkinson, & Smith, 2004). Z  
5 (Gaussianised T/F) statistic images were thresholded non-parametrically using clusters determined  
6 by  $Z > 3.1$  and a (corrected) cluster significance threshold of  $p = 0.05$  across the entire brain  
7 (Worsley, 2001).

8 Overall, there were three contrasts of interest: (1) the main effect of focus condition (Cardiac Focus  
9 vs Somatosensory Focus), (2) the main effect correct signal detection (Hits vs Misses), and (3) the  
10 interaction effect (Cardiac Hits – Cardiac Misses vs Somatosensory Hits – Somatosensory Misses).

11 For completeness, we also conducted additional set of analyses, whereby as opposed to modelling  
12 the whole epochs, we modelled the onsets of the heartbeats and vibrotactile stimuli. The details of  
13 that analysis and results is reported in Supplementary Materials.

14 In all reported analysis, the Harvard-Oxford cortical and subcortical probabilistic atlases (Desikan et  
15 al., 2006; Frazier et al., 2005; Makris et al., 2006) were used to identify each region revealed.

#### 16 *CONJUNCTION ANALYSIS*

17 To identify regions that show common activity in Cardiac and Somatosensory conditions, we  
18 conducted a formal conjunction analysis (Nichols, Brett, Andersson, Wager, & Poline, 2005) using FSL  
19 `easythresh_conj` function (FMRIB, Oxford, UK, Part of FSL - FMRIB's Software Library,  $p < 0.05$ ).

#### 20 *PSYCHO-PHYSIOLOGICAL INTERACTION ANALYSIS*

21 To look at task-specific changes in the relationship between activity in an identified seed region and  
22 other areas of the brain (O'Reilly, Woolrich, Behrens, Smith, & Johansen-Berg, 2012), we conducted  
23 a context-dependent psychophysiological interaction analysis (gPPI; McLaren, Ries, Xu, & Johnson,  
24 2012a).

25 The seed region was defined using the cluster from the conjunction analysis which encompassed the  
26 right Insular cortex. The seed region of interest (ROI) mask from the conjunction analysis was first  
27 transformed to each individual participant's functional native space, using inverse warping. Next, the  
28 average time courses of the ROI were extracted from motion-corrected, high-pass filtered image  
29 data (same pre-processing steps as outlined above) for each participant using `fslmeans`. The gPPI  
30 analysis was conducted FSL's FEAT. The task variables were convolved with a double-gamma  
31 hemodynamic response function, and temporal derivatives for the task variables were included in  
32 the model. The element-by-element products of the Insula ROI timeseries and the convolved task  
33 regressor (embodying the contrast of Hits and Misses) were added to the model along with the raw  
34 ROI timeseries together with the remaining task variables as in the main univariate analysis. A  
35 whole-brain contrast image for the gPPI was computed from this model and submitted for second-  
36 and third level group analyses described above. The gPPI was tested as a contrast between the two  
37 interaction regressor coefficients (i.e., Cardiac Hits vs Misses x Insula ROI – Somatosensory Hits vs  
38 Misses x Insula ROI) (McLaren, Ries, Xu, & Johnson, 2012b; O'Reilly et al., 2012).

## 39 Results

### 40 Behavioural Results

41 Since one block of the Heart Focus condition was missing for two individuals, the sample in all  
42 behavioural analyses consisted of 26 individuals. First, as a means of general comparison of both  
43 conditions, we compared the percentage of epochs where the signal of interest (i.e., heartbeat or

1 somatosensory stimulation) was present during the scanning session (Fig. 2A). RmANOVA revealed  
2 the main effect of condition [ $F(1, 25) = 24.61, p < .001, \eta^2 = 0.051$ ], with on average more  
3 somatosensory stimuli than heartbeats present ( $87.23 \pm 12.05$  and  $82.05 \pm 10.65$ , respectively). There  
4 was also a significant main effect of block [ $F(3, 75) = 3.79, p = .014, \eta^2 = 0.005$ ], as well as a condition  
5 by block interaction [ $F(3, 75) = 2.87, p = .042, \eta^2 = 0.005$ ], driven by a gradual decrease in heartbeats  
6 present across the Heart Focus blocks, due to a trend-level decrease in heart rate over time [ $F(3, 75)$   
7 =  $2.32, p = .082, \eta^2 = 0.007$ ; Fig. 2B]. The occurrence of somatosensory stimulation, on the other  
8 hand, was relatively constant throughout the task.

9 Secondly, we compared the accuracy on the task (the proportion of Hits + Correct Rejections). There  
10 was no significant main effect of condition [ $F(1, 25) = 3.99, p = .057, \eta^2 = 0.034$ ; Fig. 2C] although the  
11 effect was approaching significance with higher accuracy for the Heart vs Somatosensory Condition  
12 ( $0.39 \pm 0.09$  vs  $0.35 \pm 0.09$ , respectively). There was no main effect of block [ $F(3, 75) = 2.29, p = .085, \eta^2$   
13 =  $0.012$ ] nor an interaction [ $F(3, 75) = 0.85, p = .471, \eta^2 = 0.004$ ]. We also calculated  $d'$  as the signal  
14 detection theory index of sensitivity for all blocks collapsed together. As some participants did not  
15 have any false alarms and, therefore, the  $d'$  could not be calculated, this analysis was conducted for  
16 20 participants only. The paired samples  $t$ -test revealed no significant differences in  $d'$  between the  
17 focus conditions,  $t(19) = 1.01, p = .327, [-0.36, 0.13]$ .

18 Additionally, we compared confidence ratings on the task (Fig. 2D). There was a main effect of  
19 condition [ $F(1, 25) = 7.83, p = .010, \eta^2 = 0.032$ ], with higher confidence for the Somatosensory  
20 ( $2.88 \pm 0.46$ ) than the Cardiac ( $2.69 \pm 0.56$ ) condition, no main effect of block [ $F(3, 75) = 1.02, p = .387,$   
21  $\eta^2 = 0.003$ ], but the interaction was significant [ $F(3, 75) = 3.76, p = .014, \eta^2 = 0.011$ ], suggesting that  
22 the confidence fluctuated differently across blocks for the Cardiac and Somatosensory Conditions.

23 Finally, to compare in-the-scanner task performance with the accuracy in the more-established  
24 Heartbeat Counting Task, which was carried out during the practise behavioural session outside of  
25 the scanner, we computed Pearson's correlation coefficient between Accuracy in the Heartbeat  
26 Detection Task and IAcc score (Fig. 2E). We found a positive but not-significant relationship between  
27 the two measures,  $r(25) = 0.30, p = .133$ , suggesting that participants who performed well in the  
28 Heartbeat Detection Task did not necessarily have high accuracy in the Heartbeat Counting Task.  
29 There were also no significant correlations between IAcc and accuracy in the somatosensory  
30 detection condition of the in-the-scanner detection task,  $r(25) = 0.12, p = .575$ , but performance in  
31 the heart detection condition did correlate with performance in the somatosensory detection  
32 condition,  $r(25) = 0.40, p = .043$  (Fig. 2F). Important to note that individuals for the MRI session were  
33 selected if they had high IAcc. Thus, for this correlation there might be limited variance in the IAcc  
34 and Heartbeat Detection scores as we do not have individuals from the lower end of the spectrum  
35 on both scales.

36 Taken together, the behavioural performance between the two conditions was comparable although  
37 participants reported higher confidence for the Somatosensory condition. Therefore, the conditions  
38 were well matched in terms of objective difficulty, but the Somatosensory Detection Task was  
39 subjectively perceived as easier.

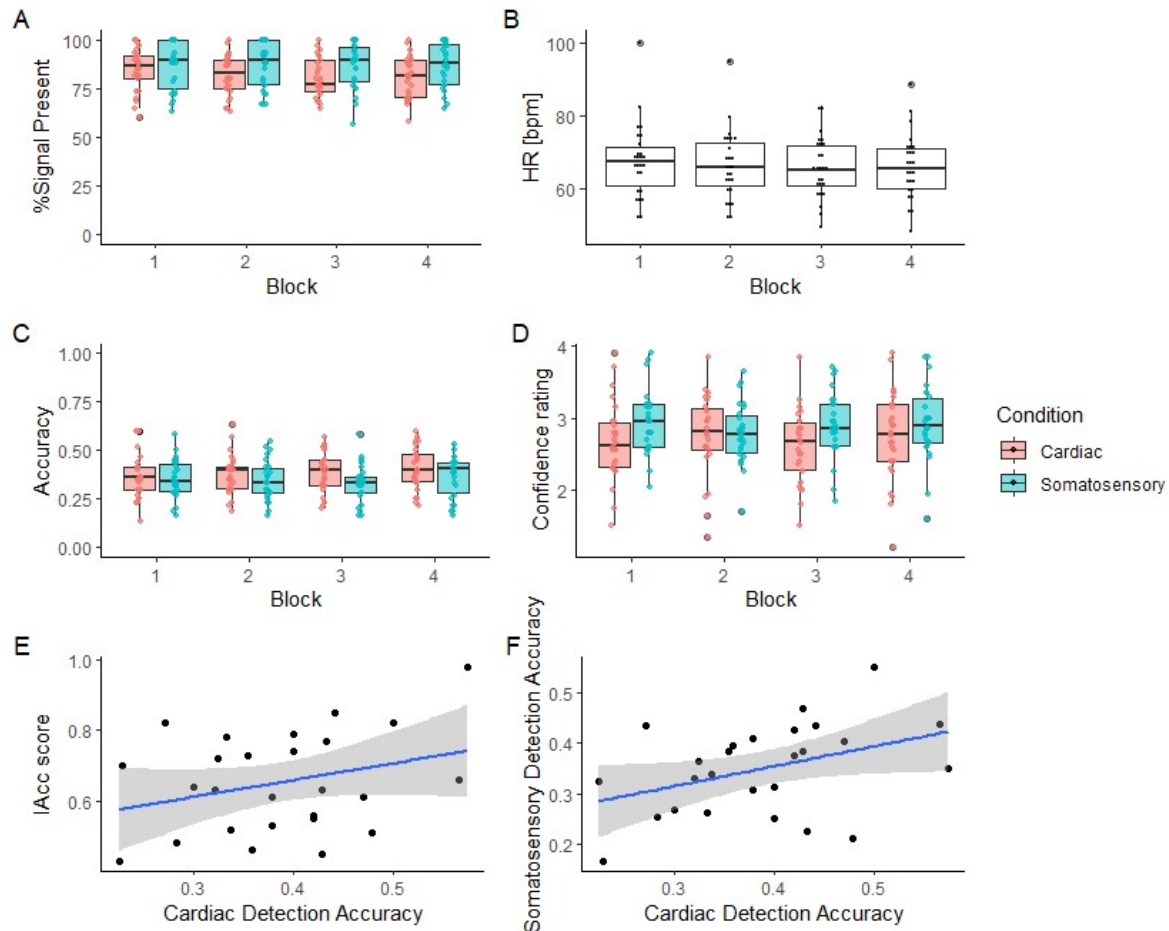

1

2 *Figure 2 Performance on the behavioural detection task during the scanning session. A. Percentage of trials in which*  
 3 *heartbeat or somatosensory stimuli were present. B. Average heart rate (HR) per Cardiac Condition block. C. Accuracy*  
 4 *(proportion of Hits with Corrects Rejections) per block and condition. D. Mean confidence per block of the task conditions. E.*  
 5 *Scatterplot presenting the relationship between the interoceptive accuracy (IAcc) score on the Heartbeat Counting Task and*  
 6 *the accuracy on the Heartbeat detection Task [ $r(25) = 0.30$ ,  $p = .133$ ]. F. The relationship between accuracy on the*  
 7 *Somatosensory and Heartbeat detection task [ $r(25) = 0.40$ ,  $p = .043$ ]. Shaded area in the scatterplots represents 95% CI.*

## 8 Focusing on cardiac and somatosensory signals

9 First, we looked at simply main effects of Cardiac and Somatosensory focus conditions (i.e. Cardiac  
 10 Focus > baseline and Somatosensory > baseline). Both contrasts evoked a robust activation  
 11 encompassing parietal, frontal and occipital areas (see Table 1 for details). Next, to study the extent  
 12 of this overlap we conducted a formal conjunction analysis. The analysis confirmed a large overlap in  
 13 the pattern of activation in these two conditions (Fig. 3A, Table 1). These include the right frontal  
 14 operculum cortex extending towards insular cortex and inferior frontal gyrus, the lateral occipital  
 15 cortex, bilaterally, extending towards angular gyrus and superior parietal cortex, fusiform gurus, the  
 16 supramarginal gyrus as well as juxtapositional lobule cortex extending into paracingulate cortex.  
 17 Together these analyses show that cardiac and somatosensory focus recruit broadly the same,  
 18 mainly right-lateralised, regions.

19 In terms of differences between the focus conditions, that is depending on whether participants  
 20 were instructed to focus on cardiac or somatosensory signals, the **Cardiac Focus > Somatosensory**  
 21 **Focus** contrast yielded increased prefrontal (superior frontal and middle frontal gyri) as well as  
 22 occipital (lateral occipital cortex extending into the angular gyrus) activation (Fig. 3B, Table 1). The  
 23 reverse contrast **Somatosensory > Cardiac Focus** did not result in any suprathreshold clusters.

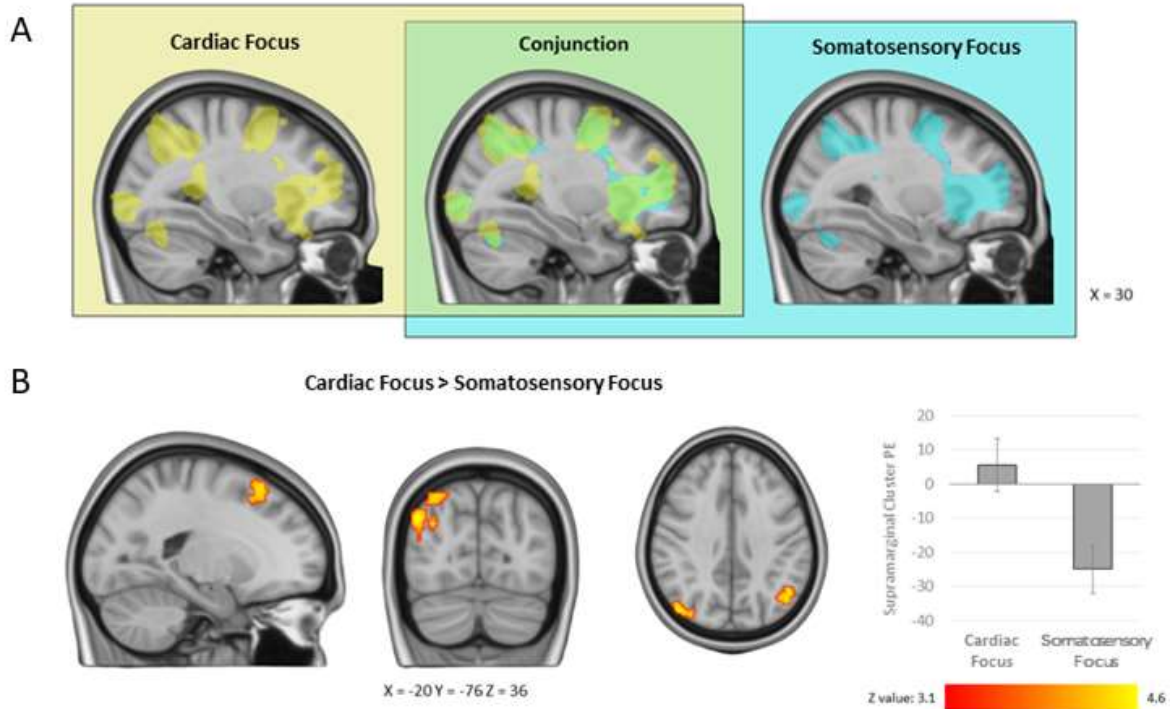

1  
2  
3  
4  
5  
6  
7  
8

Figure 3 Results of the Univariate Analyses. (A) Regions activated during Cardiac Focus vs baseline (in yellow) and Somatosensory Focus condition vs baseline (in blue) and the results of the conjunction analysis between these two contrasts (in green). (B) Regions showing greater activation in the Cardiac Focus vs Somatosensory Focus condition. Bar plot represents the parameter estimates (PE) averaged over the whole cluster, error bars represent one standard error of the mean. All images are presented in the radiological convention: the right side of the brain is depicted in the left side of the image with coordinated in the MNI space.

1 *Table 1 Results of the simple univariate analysis, looking at the focus to cardiac and somatosensory stimuli.*

| Cluster Size<br>(Voxels)                                                 | P      | Z-<br>MAX | Coordinates |     |     | Side  | Peak Activation Region                      |
|--------------------------------------------------------------------------|--------|-----------|-------------|-----|-----|-------|---------------------------------------------|
|                                                                          |        |           | X           | Y   | Z   |       |                                             |
| <b>Cardiac Focus &gt; Somatosensory Focus</b>                            |        |           |             |     |     |       |                                             |
| 413                                                                      | < .001 | 4.2       | -20         | 22  | 56  | Left  | Superior Frontal gyrus                      |
| 400                                                                      | < .001 | 4.6       | 44          | -76 | 36  | Right | Lateral Occipital Cortex, superior division |
| 263                                                                      | .004   | 4.09      | 26          | 12  | 64  | Right | Superior Frontal Gyrus                      |
| 211                                                                      | .013   | 4.27      | -48         | -60 | 36  | Left  | Lateral Occipital Cortex, superior division |
| <b>Cardiac Focus &gt; Baseline</b>                                       |        |           |             |     |     |       |                                             |
| 18567                                                                    | < .001 | 6.56      | 32          | 28  | 2   | Right | Frontal Orbital cortex                      |
| 13795                                                                    | < .001 | 5.64      | -58         | -46 | 16  | Left  | Supramarginal Gyrus                         |
| 600                                                                      | < .001 | 5.49      | -34         | -90 | -10 | Left  | Lateral Occipital cortex                    |
| 230                                                                      | .018   | 4.12      | 64          | -20 | 26  | Right | Supramarginal Gyrus                         |
| <b>Conjunction (Cardiac Focus <math>\cap</math> Somatosensory Focus)</b> |        |           |             |     |     |       |                                             |
| 37139                                                                    | < .001 | 6.24      | -6          | 10  | 56  | Left  | Superior Frontal Gyrus                      |
| 2545                                                                     | .005   | 5.43      | 34          | -90 | -4  | Right | Lateral Occipital Cortex                    |
| <b>Somatosensory Focus &gt; Baseline</b>                                 |        |           |             |     |     |       |                                             |
| 17457                                                                    | < .001 | 6.27      | -8          | 10  | 54  | Left  | Superior Frontal Gyrus                      |
| 3317                                                                     | < .001 | 6.02      | 62          | -22 | 20  | Right | Parietal Operculum Cortex                   |
| 1300                                                                     | < .001 | 5.57      | 34          | -90 | -2  | Right | Lateral Occipital Cortex                    |
| 959                                                                      | < .001 | 4.81      | 6           | -28 | 24  | Right | Cingulate gyrus, posterior division         |
| 396                                                                      | .001   | 6.43      | -34         | -92 | -2  | Left  | Occipital Pole                              |
| 389                                                                      | .001   | 4.18      | 18          | -12 | 10  | Right | Thalamus                                    |

2

### 3 [Conscious perception of cardiac and somatosensory signals](#)

4 We next investigated the neural correlates of consciously detected (Hits) and undetected (Misses)  
5 sensations across both conditions, as well as for each condition alone. For the detection by condition  
6 interaction effect [(Hits-Misses Cardiac) vs (Hits – Misses Somatosensory)], there were no  
7 suprathreshold clusters. Constricting the analysis to bilateral insular cortex (ROI analysis) also yielded  
8 no suprathreshold voxels. This suggests that detection of signals across both interoceptive and  
9 somatosensory domains engaged overlapping neural networks.

10 The main effect **Hits > Misses contrast** revealed a robust activation encompassing cortical (frontal,  
11 parietal and occipital) as well as subcortical areas bilaterally. These included precentral gyri, inferior,  
12 middle and superior frontal gyri, paracingulate cortex, insula, thalamus, putamen and caudate, brain  
13 stem, supramarginal gyrus, superior parietal lobule, postcentral gyri, lateral occipital cortex and  
14 precuneus (Fig 4A, Table 2). We followed this analysis with a formal conjunction analysis, looking at  
15 the brain areas that show overlapping activity when heartbeats and somatosensory stimuli were  
16 correctly detected. Indeed, we observed a robust overlap within all clusters (Fig 4B, Table 2).  
17 Nevertheless, the spread of activation seems to be greater for the Somatosensory condition,  
18 particularly in the frontal and temporal areas, and also extending towards cerebellum.

1    **The reverse main effects contrast (Misses > Hits)** revealed activations in bilateral temporal fusiform  
2    cortex, lingual gyrus, hippocampus and parahippocampal gyrus, inferior and middle temporal gyri,  
3    precuneus cortex, cingulate gyrus, fusiform gyrus, cuneal cortex as well as lateral occipital cortex and  
4    lingual gyrus (Fig 4C, Table 2). The conjunction analysis revealed no significant overlap of processing  
5    missed sensations of both types of sensations (Fig 4D). For the Cardiac condition, the activation was  
6    limited to frontal pole and posterior cingulate gyrus, extending towards precuneus. The activation  
7    seemed, again, more robust for the Somatosensory condition, where the activation also  
8    encompassed lateral occipital cortex, temporal cortex, hippocampus and parahippocampal gyrus,  
9    cuneal and precuneus cortex.

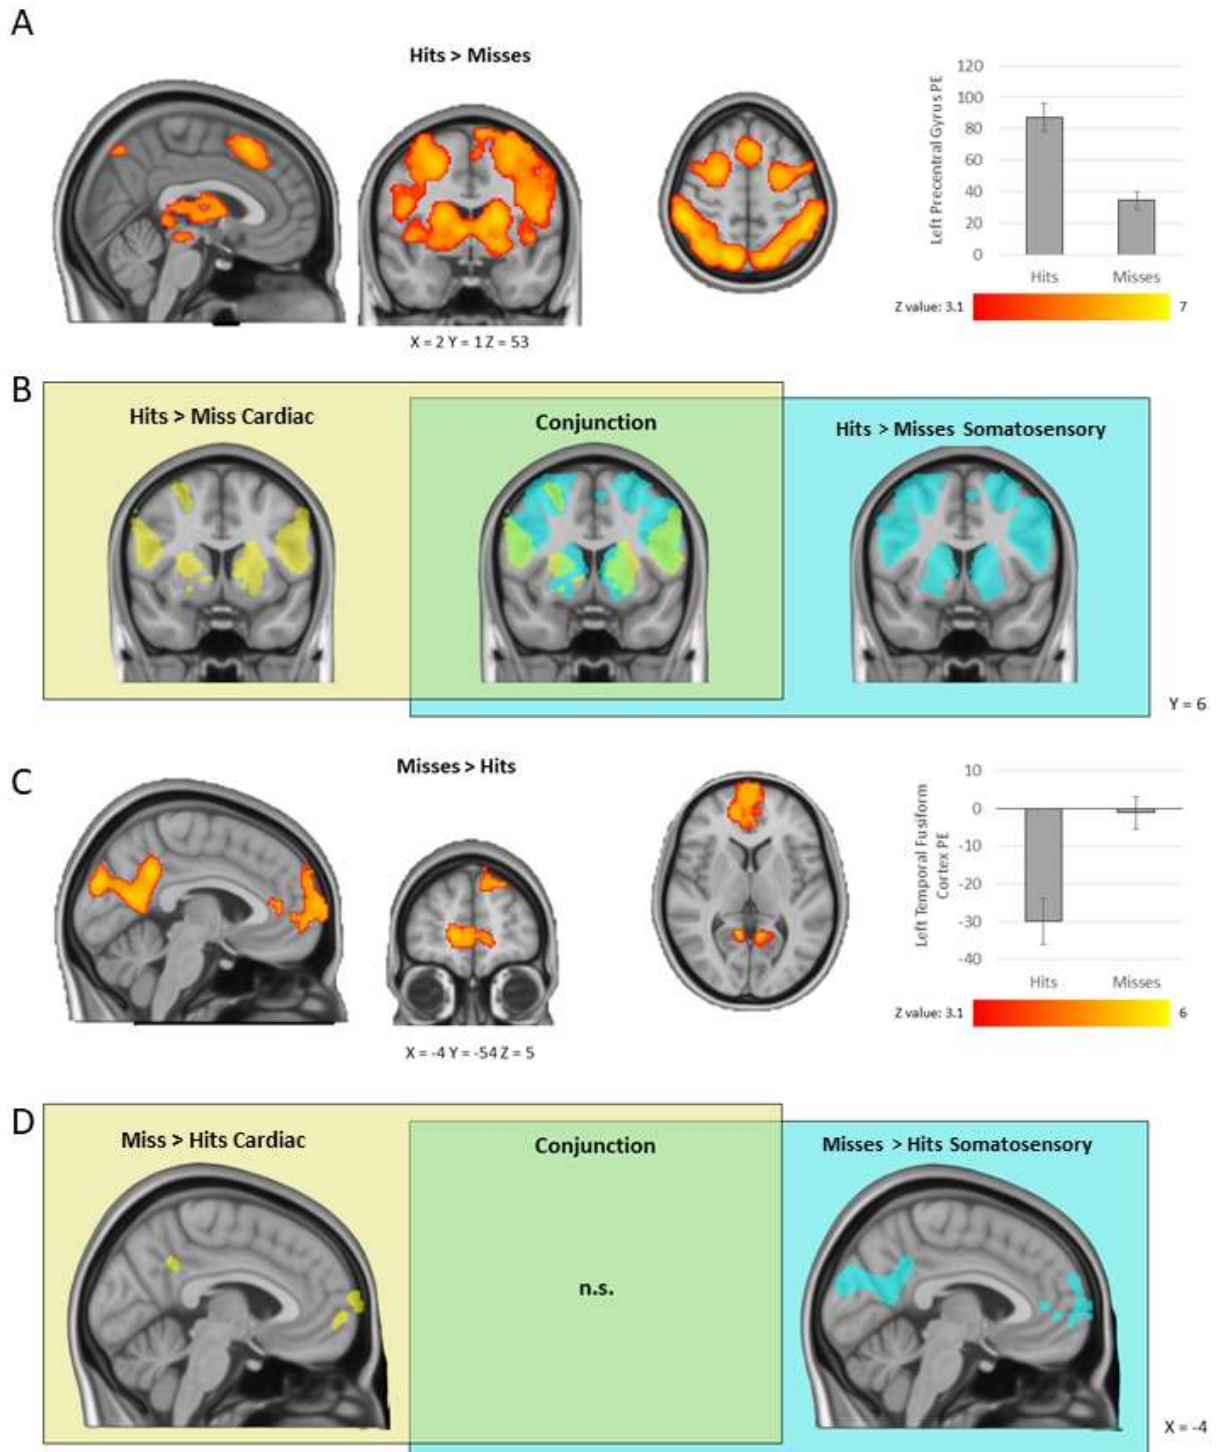

1

2 *Figure 4 Results of the complex univariate analysis, investigating differences between consciously and non-consciously*  
 3 *perceived sensations. Main effects analysis of Hits > Misses (A) and the conjunction analysis results (B) showing areas of*  
 4 *greater activation during Hits vs Misses for each focus condition and the results of the conjunction analysis (in green). Main*  
 5 *effect analysis of Misses > Hits (C) and the activations for each condition separately (D). All images are presented in the*  
 6 *radiological convention: the right side of the brain is depicted in the left side of the image with coordinated in the MNI*  
 7 *space. Bar plots represent the parameter estimates (PE) averaged over the whole cluster, error bars represent one standard*  
 8 *error of the mean.*



1 *Table 2 Results of the complex univariate analysis, investigating differences between consciously and non-consciously*  
 2 *perceived sensations.*

| Cluster Size<br>(Voxels)              | P      | Z-<br>MAX | Coordinates |     |     | Side  | Peak Activation Region                   |
|---------------------------------------|--------|-----------|-------------|-----|-----|-------|------------------------------------------|
|                                       |        |           | X           | Y   | Z   |       |                                          |
| <b>Main Effect: Hits &gt; Misses</b>  |        |           |             |     |     |       |                                          |
| 23071                                 | < .001 | 6.00      | -10         | -14 | 6   | Left  | Thalamus                                 |
| 11050                                 | < .001 | 6.72      | 50          | -38 | 46  | Right | Supramarginal gyrus                      |
| 543                                   | .001   | 5.46      | 30          | -66 | -26 | Right | Cerebellum                               |
| 405                                   | .005   | 5.49      | -26         | -70 | -22 | Left  | Occipital fusiform gyrus                 |
| 337                                   | .011   | 4.92      | 56          | -32 | -14 | Right | Inferior temporal gyrus                  |
| <b>Hits &gt; Misses Cardiac</b>       |        |           |             |     |     |       |                                          |
| 3008                                  | < .001 | 5.01      | 54          | -42 | 56  | Right | Supramarginal Gyrus                      |
| 2662                                  | < .001 | 4.79      | -48         | -46 | 56  | Left  | Supramarginal Gyrus                      |
| 1579                                  | < .001 | 4.72      | 16          | -10 | 14  | Right | Thalamus                                 |
| 1335                                  | < .001 | 4.69      | -56         | 10  | 40  | Left  | Middle Frontal Gyrus                     |
| 823                                   | < .001 | 4.35      | 52          | 6   | 20  | Right | Precentral Gyrus                         |
| 485                                   | .003   | 4.24      | 26          | 0   | 50  | Right | Middle Frontal Gyrus                     |
| 275                                   | .032   | 3.92      | -34         | 2   | 64  | Left  | Middle Frontal Gyrus                     |
| <b>Hits &gt; Misses Somatosensory</b> |        |           |             |     |     |       |                                          |
| 17454                                 | < .001 | 6.81      | 48          | 16  | 28  | Right | Inferior Frontal Gyrus, pars opercularis |
| 9734                                  | < .001 | 6.53      | 44          | -42 | 44  | Right | Supramarginal Gyrus                      |
| 1232                                  | < .001 | 6.15      | -2          | 20  | 48  | Left  | Paracingulate Gyrus                      |
| 350                                   | .004   | 5.19      | 28          | -68 | -26 | Right | Cerebellum                               |
| 320                                   | .006   | 4.69      | -26         | -70 | -24 | Left  | Cerebellum                               |
| 317                                   | .006   | 4.69      | 56          | -32 | -14 | Right | Inferior Temporal Gyrus                  |
| <b>Main Effect: Misses &gt; Hits</b>  |        |           |             |     |     |       |                                          |
| 3387                                  | < .001 | 5.78      | 14          | -84 | 28  | Right | Cuneal cortex                            |
| 1845                                  | < .001 | 4.98      | 6           | 66  | -2  | Right | Frontal pole                             |
| 1004                                  | < .001 | 5.10      | -26         | -44 | -14 | Left  | Temporal fusiform cortex                 |
| 909                                   | < .001 | 5.00      | 24          | -46 | -12 | Right | Lingual gyrus                            |
| 676                                   | < .001 | 5.62      | -48         | 0   | -22 | Left  | Superior temporal gyrus                  |
| 274                                   | .026   | 4.48      | 38          | 12  | -26 | Right | Temporal pole                            |
| <b>Misses &gt; Hits Cardiac</b>       |        |           |             |     |     |       |                                          |
| 562                                   | .001   | 4.56      | 6           | 64  | -2  | Right | Frontal Pole                             |
| 447                                   | .004   | 3.93      | 8           | -48 | 32  | Right | Cingulate Gyrus, posterior division      |
| <b>Misses &gt; Hits Somatosensory</b> |        |           |             |     |     |       |                                          |
| 3111                                  | < .001 | 5.66      | 18          | -84 | 26  | Right | Lateral Occipital Cortex                 |
| 995                                   | < .001 | 5.03      | -26         | -42 | -14 | Left  | Temporal fusiform Cortex                 |
| 967                                   | < .001 | 4.68      | 16          | 50  | 2   | Right | Paracingulate Gyrus                      |

|     |        |      |     |     |     |       |                          |
|-----|--------|------|-----|-----|-----|-------|--------------------------|
| 838 | < .001 | 4.35 | 26  | -64 | -6  | Right | Occipital Fusiform Gyrus |
| 776 | < .001 | 5.58 | -50 | -2  | -24 | Left  | Middle Temporal Gyrus    |

**Conjunction (Hits > Misses Cardiac  $\cap$  Hits > Misses Somatosensory)**

|      |        |      |     |     |    |       |                      |
|------|--------|------|-----|-----|----|-------|----------------------|
| 2692 | < .001 | 5.01 | 54  | -42 | 56 | Right | Supramarginal Gyrus  |
| 2414 | < .001 | 4.79 | -48 | -46 | 56 | Left  | Supramarginal Gyrus  |
| 1227 | < .001 | 4.13 | -18 | 20  | 2  | Left  | Caudate              |
| 1044 | .001   | 4.21 | 22  | 10  | 8  | Right | Putamen              |
| 960  | .002   | 4.69 | -56 | 10  | 40 | Left  | Middle Frontal Gyrus |
| 662  | .009   | 4.35 | 52  | 6   | 20 | Right | Precentral Gyrus     |
| 450  | .034   | 4.24 | 26  | 0   | 50 | Right | Middle Frontal Gyrus |

1

2 **Psycho-physiological interactions**

3 We used the gPPI to test the hypothesis that the functional connectivity strength of the right insula  
 4 cortex ROI would be differentially modulated by the conscious detection (i.e. Hits > Misses) of  
 5 Cardiac versus Somatosensory stimuli. Indeed, we observed a significant interaction effect whereby  
 6 the functional connectivity of the right anterior Insula ROI was greater for consciously detected  
 7 heartbeats than somatosensory stimuli (Table 3, Fig 5). Specifically, conscious detection of  
 8 heartbeats was related to increased connectivity with the lateral occipital cortex extending towards  
 9 cuneal and precuneus cortex, right middle temporal gyrus, lingual gyrus, occipital pole, left  
 10 supramarginal gyrus extending towards postcentral gyrus as well as left planum temporale  
 11 extending towards parietal and central operculum cortex. These differences suggest that top-down  
 12 attentional processes and conscious detection of different sensory events might modulate the right  
 13 anterior insular cortex functional connectivity.

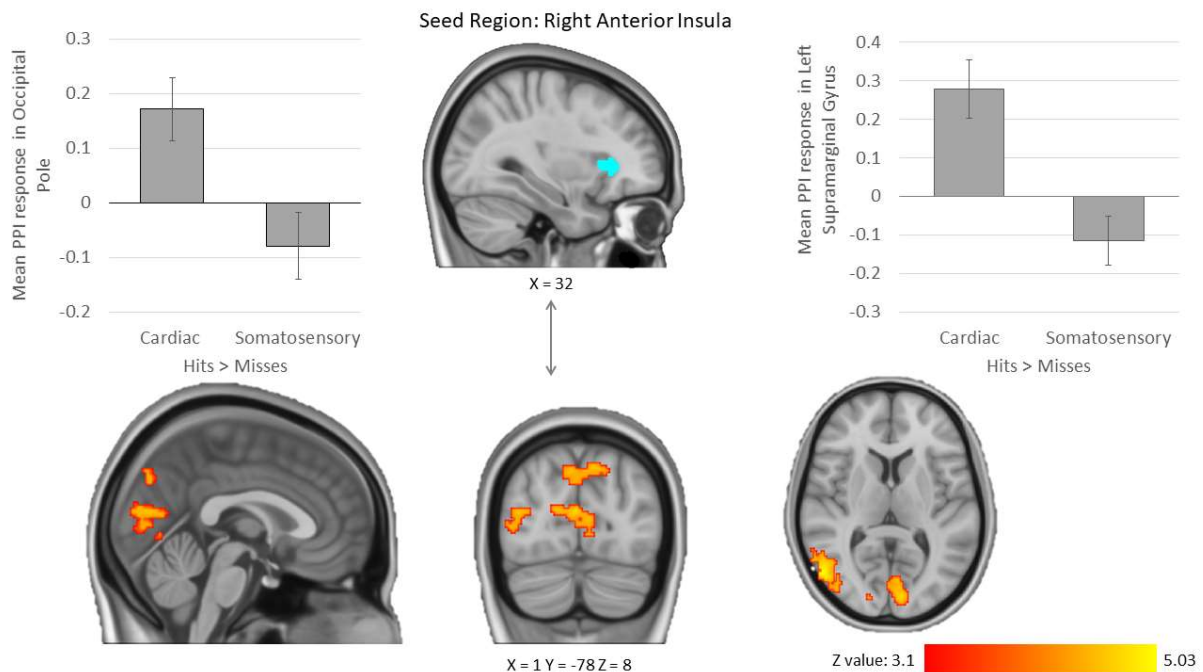

14

15 *Figure 5 PPI results showing greater functional connectivity between the right insula seed and occipital and parietal areas in*  
 16 *the Cardiac Focus vs Somatosensory Focus during Hits relative to Misses contrast. Images are presented in the radiological*  
 17 *convention: the right side of the brain is depicted in the left side of the image with coordinated in the MNI space. Bar plots*  
 18 *represent the PPI response averaged across the whole cluster; error bars represent one standard error of the mean.*

1 *Table 3 PPI results for Cardiac Focus > Somatosensory Focus contrast. The coordinates for clusters maxima are presented in*  
 2 *MNI space.*

| Cluster size (voxels) | P      | Z-max | Coordinates |     |    | Side  | Peak activation region                         |
|-----------------------|--------|-------|-------------|-----|----|-------|------------------------------------------------|
|                       |        |       | X           | Y   | Z  |       |                                                |
| 813                   | < .001 | 4.45  | -6          | -90 | 6  | Left  | Occipital pole                                 |
| 414                   | .001   | 5.03  | 54          | -70 | 8  | Right | Lateral occipital cortex                       |
| 225                   | .015   | 4.71  | -64         | -26 | 24 | Left  | Supramarginal gyrus                            |
| 224                   | .015   | 4     | -6          | -84 | 44 | Left  | Lateral occipital cortex                       |
| 179                   | .038   | 4.14  | -44         | -40 | 18 | Left  | Planum temporale/<br>Parietal operculum cortex |

3

## 4 Discussion

5 The current study used a novel Heartbeat-Somatosensory detection paradigm to understand better  
 6 the neural correlates of interoceptive and somatosensory attention and conscious detection.  
 7 Additionally, we investigated the neural networks underpinning conscious and non-conscious  
 8 perception of these stimuli. Overall, we observed a robust overlap in the pattern of activation  
 9 evoked by both Focus conditions in frontal, parietal and occipital areas, including insular cortex.  
 10 Correct detection of stimuli (Hits > Misses), heartbeats and somatosensory stimuli alike, evoked  
 11 greater activation in frontal, parietal occipital, and insular cortex areas, as well as subcortical areas  
 12 and brain stem. On the other hand, undetected stimuli (Misses > Hits evoked greater activations in  
 13 frontal pole, posterior cingulate and precuneus as well as temporal areas. Nevertheless, we also  
 14 observed some important differences. Cardiac Focus yielded increased prefrontal (superior frontal  
 15 and middle frontal gyri) and occipito-parietal (lateral occipital cortex extending into angular gyrus)  
 16 activation relative to the Somatosensory Focus condition. Additionally, psychophysiological  
 17 interactions analysis revealed that right insular cortex functional connectivity was modulated by the  
 18 conscious detection of both interoceptive and exteroceptive sensations, showing greater  
 19 connectivity with a set of occipito-parietal regions during Cardiac compared to Somatosensory  
 20 Focus. Together, our results suggest a large degree of convergence between interoceptive and  
 21 (proximal) exteroceptive stimuli processing.

## 22 Cardiac versus somatosensory focus

23 Focus to interoceptive signals (Cardiac Focus condition) yielded increased prefrontal (superior  
 24 frontal and middle frontal gyri) as well as occipital (lateral occipital cortex extending into the angular  
 25 gyrus) activation compared to Somatosensory Focus condition. Both, prefrontal and occipital  
 26 activations in interoceptive conditions have been identified previously (Critchley et al., 2004; Stern  
 27 et al., 2017; Wang et al., 2019). The superior and middle frontal gyri are both strongly involved in  
 28 attentional and cognitive control in general (Bauer, Barrios, & Díaz, 2014; Talati & Hirsch, 2005;  
 29 Weber & Huettel, 2008; Wilbertz et al., 2014), particularly in focused attention tasks and meditation  
 30 (Brefczynski-Lewis, Lutz, Schaefer, Levinson, & Davidson, 2007; Doll et al., 2016). For example, the  
 31 left superior frontal gyrus/middle frontal gyrus area consistently showed increased activation in  
 32 expert meditators during focused attention meditation (Brefczynski-Lewis et al., 2007). Therefore,  
 33 enhanced activity in these areas may reflect higher cognitive and attentional resources engaged in  
 34 task performance during Cardiac Focus vs Somatosensory Focus Condition, results consistent with  
 35 behavioural findings, whereby participants showed lower confidence in the Cardiac than  
 36 Somatosensory condition, suggestive of the former being subjectively more difficult. Similarly,

1 elevated occipital activation may reflect increased visual attention. The angular gyrus is considered  
2 to be a cross-modal integrative hub for converging information from different sensory modalities  
3 (for review see (Seghier, 2013). Given the relatively higher perceived difficulty of our Heartbeat  
4 Detection task, which involves integration of visual cues with internal bodily signals, the angular  
5 gyrus involvement as an integrative hub seems key.

6 However, we did not find any differences in activation between the Cardiac and Somatosensory  
7 focus conditions within the insula or the anterior cingulate cortex, regions commonly considered to  
8 be the key elements of interoceptive processing (A. D. (Bud) Craig, 2009; Critchley et al., 2004;  
9 Salvato et al., 2019; Schulz, 2016). Importantly though, the role of insula extends well beyond  
10 interoception and encompasses salience processing (Uddin, 2015), emotional awareness and  
11 regulation (Critchley, 2009; Phan, Wager, Taylor, & Liberzon, 2002; Shafritz, Collins, & Blumberg,  
12 2006), as well as sensory processing and multimodal integration more generally (Avery et al., 2015;  
13 Plailly, Radnovich, Sabri, Royet, & Kareken, 2007; Simmons et al., 2013; Y. Suzuki et al., 2001).  
14 Indeed, previous neuroimaging studies showed that vibrotactile stimulation using pneumatic  
15 devices, as in the present study, predominantly elicits activation of the primary and secondary  
16 somatosensory cortex as well as the insula and the thalamus (e.g., (Briggs et al., 2004; Chakravarty et  
17 al., 2009; Chang et al., 2009; Golaszewski et al., 2006; Nelson et al., 2004). These regions show  
18 overlap with the network we identified by conjunction analysis of Cardiac and Somatosensory Focus  
19 conditions in the current study.

20 Overall, the focus to cardiac signals and somatosensory stimuli in our study showed highly  
21 overlapping activation patterns in several brain regions, including the insula, the cingulate, frontal  
22 gyri, somatomotor and occipital regions. This network of activity is highly congruent with the  
23 anatomical structures of the interoceptive network identified in previous studies (e.g., Critchley et  
24 al., 2004; Kuehn et al., 2016; Pollatos et al., 2007a; Stern et al., 2017; Zaki, Davis, & Ochsner, 2012b).  
25 The extent of overlap revealed in the conjunction analysis points to a large degree of commonality  
26 between the two modalities of body processing. Such large overlap may indicate an important role  
27 of these structures for bodily self-consciousness but also suggests that somatosensory pathways,  
28 rather than solely interoceptive pathways, participate in cardioception (Khalsa, Rudrauf, Feinstein,  
29 & Tranel, 2009).

30 The overlap was found in several parietal regions, such as supramarginal gyrus (SMG), angular gyrus,  
31 and superior parietal lobule, all of which are implicated in multisensory processing and integration. A  
32 recent meta-analysis revealed that the internal (interoceptive) and external (related to the  
33 experience of body-ownership) signals integration occurs in the SMG bilaterally together with a  
34 right-lateralized set of areas such as the precentral, postcentral, and superior temporal gyri (Salvato  
35 et al., 2019). These higher-order brain areas are involved in integrating multisensory signals, and in  
36 recalibrating information from different incoming channels and spatial frames of reference (Salvato  
37 et al., 2019). The right SMG is also important for proprioception (Ben-Shabat, Matyas, Pell,  
38 Brodtmann, & Carey, 2015), while left SMG is associated with decoding of self-location (Guterstam,  
39 Björnsdotter, Gentile, & Ehrsson, 2015) and perceiving limbs in space in a body-centred reference  
40 (Brozzoli, Gentile, & Henrik Ehrsson, 2012). It has been suggested that primary somatosensory areas  
41 together with left fronto-parietal areas are involved in processing proprioceptive and interoceptive  
42 bodily information that underlies body-representations (Bauer, Díaz, Concha, & Barrios, 2014).

43 We also found an extensive overlap in activation in the lateral occipital cortex. Prior research  
44 identified regions of lateral occipito-temporal cortex (extrastriate body area and the fusiform body  
45 area) to be involved in body processing, not only when viewing images of the human body and body  
46 parts (Costantini, Urgesi, Galati, Romani, & Aglioti, 2011; Taylor, Wiggett, & Downing, 2007; Urgesi,

1 Candidi, Ionta, & Aglioti, 2007), but also when engaging in mental imagery of embodied self-location  
2 (Arzy et al., 2006), mental manipulation of body parts (Kikuchi et al., 2017) as well as experiencing  
3 illusory body ownership (Limanowski, Lutti, & Blankenburg, 2014). Possibly, while focusing on  
4 perception of one's heartbeat or on detecting stimuli applied to one's hand, participants saw the  
5 relevant body parts in their minds' eye.

6 Overall, our results point to a large degree of convergence in neural mechanisms underlying  
7 attentional mechanism directed towards interoceptive (heartbeats) and exteroceptive (vibrotactile)  
8 stimuli. We found little evidence for divergence between these two processes. To some extent,  
9 these results may reflect our design, namely the types of stimuli used (proximal, vibrotactile  
10 stimulation), their continuing presence throughout and the relative difficulty of the task, but also the  
11 inherent convergence of bodily-related signals. Our brains may be primarily wired to integrate rather  
12 than separate proximal exteroceptive and interoceptive bodily signals.

### 13 [Conscious and non-conscious stimuli detection](#)

14 Apart from the main and conjunctive effects of attention directed internally or externally, we also  
15 investigated the aspects of conscious perception of stimuli. We did not find any interaction effect  
16 regarding detection accuracy (felt vs missed sensations) and focus condition. This may reflect high  
17 task-demands and comparable difficulty of the tasks, as determined by behavioural performance  
18 that was found to be correlated between the two conditions. Moreover, in order to match the  
19 conditions as closely as possible, we ensured there was a train of somatosensory stimuli throughout  
20 the cardiac focus blocks. This was important to mimic the continuous presence of the heart beat  
21 during the somatosensory blocks, but likely increased the difficulty of the task and reduced our  
22 ability to detect differences in the BOLD response between the conditions. Instead, correctly  
23 detected sensations compared to missed sensations (Hits > Misses) across both conditions evoked  
24 activations in frontal (inferior, middle and superior frontal gyri, paracingulate cortex), somatomotor  
25 areas, the insula, as well as subcortical areas (thalamus, putamen and caudate), brain stem,  
26 supramarginal gyrus, superior parietal lobule, lateral occipital cortex, and precuneus. This pattern of  
27 activation was highly consistent across both conditions as revealed by the conjunction analysis. This  
28 pattern of activation bares resemblance to the salience network and executive control network  
29 (Seeley et al., 2007). The salience network consists of anterior cingulate cortex and orbital frontal  
30 insula; both regions co-activate in response to varied forms of salience (Seeley et al., 2007).  
31 Moreover, as a part of this network, anterior insula is considered an integral hub enabling dynamic  
32 switches between externally and internally oriented attention (Menon & Uddin, 2010; Uddin, 2015).  
33 The executive control network encompasses dorsolateral prefrontal and parietal cortices and is  
34 thought to underlie many goal-directed processes such as sustained attention and working memory  
35 as well as response selection and suppression (Seeley et al., 2007). Therefore, given the role of these  
36 networks in detecting salience and goal-directed attentional switches, the activation of these regions  
37 in consciously detected bodily/external cues is not surprising.

38 In contrast, the reversed comparison, Misses > Hits, evoked no significantly overlapping areas of  
39 activation across both conditions. Missed heartbeats were associated with frontal pole, posterior  
40 cingulate and precuneus activation, while missed Somatosensory stimuli were also associated with  
41 more widespread activation in frontal and temporal regions. These results suggest some degree of  
42 separation between un-conscious processing or cardiac and somatosensory stimuli. Nevertheless,  
43 the main effect of Misses > Hits across both conditions evoked frontal pole, posterior cingulate and  
44 precuneus as well as temporal activations. Overall, these activations show some resemblance to the  
45 default mode network (DMN) which encompasses the precuneus/cingulate cortex, medial prefrontal  
46 cortex as well as areas of parietal cortex (Mason et al., 2007; Raichle et al., 2001). The DMN shows

1 lower activation during task relative to resting condition. Nevertheless, it is thought to play a far  
2 more important role than just allowing us to daydream, as it is linked to self-referential activity,  
3 reflecting upon one's own mental state, introspection and autobiographical memory (Andrews-  
4 Hanna, Smallwood, & Spreng, 2014; D'Argembeau et al., 2005; Gusnard & Raichle, 2001). Therefore,  
5 the greater activation of the DMN during missed trials, may reflect simple off-task activity  
6 (inattention), but it could also reflect aspects of self-reflection. This clear differentiation between  
7 task-positive networks, underlying aspect of attentional control and salience processing during  
8 correct detections and greater activation of task-negative DMN during missed trials may determine  
9 performance in the task.

10 Noteworthy, our findings are different from previous studies looking at conscious detection of  
11 exteroceptive stimuli (Meneguzzo et al., 2014). In that meta-analysis, conscious detection of stimuli  
12 was associated with greater activity in left anterior cingulate cortex and mid-caudal anterior  
13 cingulate cortex, while non-conscious perception evoked consistently greater activations in right  
14 fusiform gyrus/middle occipital gyrus, right caudal anterior cingulate cortex and right insula. Our  
15 findings, instead, suggest insular activation in response to detected interoceptive and  
16 somatosensory stimuli, while undetected stimuli, on the other hand, evoked frontal, posterior (for  
17 both conditions) and anterior cingulate as well as precuneus activation (for somatosensory detection  
18 only). Therefore, our study shows the opposite pattern of results. These discrepancies may be  
19 related to the character of stimuli themselves: in the present study, cardiac and somatosensory  
20 stimuli were used, while in the meta-analysis only exteroceptive, visual and tactile, stimulation was  
21 considered. The difficulty of our task, which relied on integration of external cues (i.e. changes in  
22 colour), with sensory information (heartbeats and vibrotactile stimuli) detection, may also play an  
23 important role.

#### 24 [Right anterior insula task-related functional connectivity changes](#)

25 Even though we did not find a focus condition by detection interaction, the right insula functional  
26 connectivity showed an interaction effect. Specifically, conscious detection of heartbeats (Hits >  
27 Misses) was related to greater functional connectivity between the right insula ROI and areas  
28 encompassing occipital (lateral occipital cortex, lingual gyrus, occipital pole), parietal (cuneal and  
29 precuneus cortex, left supramarginal gyrus extending towards postcentral gyrus, parietal and central  
30 operculum cortex) as well as temporal cortices (right middle temporal gyrus, left planum temporale),  
31 relative to the conscious detection of somatosensory stimuli. Therefore, conscious detection of  
32 heartbeats was related to higher degree of communication between the right anterior insula, the  
33 area considered a key hub of interoceptive processing (A. D. (Bud) Craig, 2009; A. D. Craig, 2002;  
34 Critchley et al., 2004), and other areas of the interoceptive network (i.e. postcentral gyrus,  
35 secondary somatosensory cortex) and as well as the set of regions associated with body self-  
36 ownership (occipitotemporal and parietal areas) (Salvato et al., 2019). Noteworthy, our results  
37 indicate that conscious perception of heartbeats is related to greater functional connectivity of the  
38 right anterior insula and supramarginal gyrus, the cortical region where the processing of both body  
39 ownership and interoception converges (Salvato et al., 2019). The increased connectivity of insular  
40 ROI with the occipital cortex could be part of the long-term representation of the body involving its  
41 pictorial appearance and visualization (Bauer, Díaz, et al., 2014). Together, our results suggest that  
42 top-down attentional processes and conscious detection of different sensory events modulate the  
43 right insular cortex functional connectivity. Additionally, conscious perception of heartbeats was  
44 related to greater functional connectivity of the right anterior insula and somatosensory cortices.  
45 Functional neuroimaging findings implicate insula and anterior cingulate cortices together with  
46 somatosensory regions in interoceptive awareness (Cameron & Minoshima, 2002; Critchley et al.,

1 2004; Pollatos et al., 2007a). Moreover, insula lesion research indicated that heart rate awareness  
2 was mediated by both somatosensory afferents from the skin and a network that included the insula  
3 and anterior cingulate cortex, suggesting that both of these pathways enable the perception of  
4 cardiac signals and states (Khalsa et al., 2009). Our results further suggest that insular and  
5 somatosensory cortices work together to form a conscious cardiovascular state detection.

6 Anterior insula activity is consistently activated in studies that elicit changes in autonomic arousal  
7 (Cameron & Minoshima, 2002; Critchley, 2002; Critchley, Corfield, Chandler, Mathias, & Dolan, 2000;  
8 Critchley, Mathias, & Dolan, 2001, 2002; Critchley et al., 2003). It is also activated by visceral  
9 stimulation (Aziz, Schnitzler, & Enck, 2000), olfactory and gustatory stimuli (Rolls, 2015; Smejkal,  
10 Druga, & Tintera, 2003), pain (Peyron et al., 2002), temperature (A. D. Craig, Chen, Bandy, & Reiman,  
11 2000; Stern et al., 2017) and emotional processing (Wicker et al., 2003; Zaki et al., 2012b). Right  
12 insula cortex activity is also enhanced in appraisal of emotions and bodily physiological state,  
13 suggesting that anterior insula serves as an interface between physiologically driven internal  
14 motivational states, emotional awareness and interpersonal behaviour (Terasawa, Shibata,  
15 Moriguchi, & Umeda, 2013). Together, this supports the notion that the right anterior insula, as  
16 playing a central role in interoceptive processes and representation of bodily arousal, engenders  
17 human awareness providing a substrate for subjective feeling states (A. D. (Bud) Craig, 2009; A. D.  
18 Craig, 2002; Critchley et al., 2004).

19 Some limitations merit comment. As much as we made every effort to match both focus conditions  
20 as closely as possible, the somatosensory stimuli were present more frequently than heartbeats, due  
21 to subject's heart rate's decreasing throughout the duration of the task. One could argue that the  
22 occurrence of more somatosensory than cardiac events is a confound that could affect people's  
23 performance. Yet as we show below if anything people's accuracy was similar, if not slightly better)  
24 for cardiac than somatosensory events. Recording ECG within an MRI scanner is extremely difficult,  
25 therefore although attempts were made to match the presentation rate of the tactile stimuli to that  
26 of the subject's heartbeat during data collection, we were not able to measure heart rate in real  
27 time for the majority of subjects. The timing of each cardiac R-peak was determined after the  
28 scanning session following post-processing of the ECG signal. The Somatosensory Focus condition  
29 was also associated with higher confidence ratings than Cardiac Focus condition. However, given the  
30 lack of many differences between conditions it is unlikely that these differences were driving the  
31 results. Moreover, as the epoch duration (window of time during which participants could expect to  
32 feel the stimulus) was quite long relative to the average heartbeat cycle, both stimuli were present  
33 on the vast majority of the epochs. Therefore, there were some between-participant differences in  
34 the stimuli presentation frequency with some having no false alarms or correct rejections dependent  
35 on heart rate. This is a common problem with attempts to use signal detection theory to measure  
36 cardiac detection; it is difficult to ensure there are trials in which the heartbeat is absent particularly  
37 when a subject has a fast heart rate. Finally, we deliberately selected individuals who presented  
38 relatively good performance in our heartbeat detection task. We cannot exclude the possibility that  
39 individuals with significantly lower or higher interoceptive accuracy potentially may process sensory  
40 information coming from within and outside of the body in different ways.

## 41 [Summary and Conclusions](#)

42 In line with our hypothesis, we found overlapping but dissociable activation patterns associated with  
43 both internally- (heartbeats) and externally- (somatosensation) oriented attention. The robust  
44 overlap included key areas typically associated with interoceptive processing, including insula,  
45 somatomotor cortices, cingulate cortex, suggesting their broader role in processing body-related  
46 information to construct and maintain body self-consciousness. Nevertheless, Cardiac Focus

1 additionally evoked higher frontal and occipito-parietal areas in regions associated with cognitive  
2 control and multimodal integration. Importantly, this task provides an important advance towards  
3 experimental designs that move away from measuring interoceptive attention only to begin to  
4 delineate the neural correlates of conscious detection of interoceptive stimuli from other modalities.  
5 The correct detection of interoceptive and somatosensory sensations evoked overlapping activations  
6 in salience – control network, while missed sensations evoked activations in areas linked to the  
7 DMN. Although we did not observe an interaction with the conscious detection condition our gPPI  
8 analysis revealed that functional connectivity with the right insular cortex, a central hub for  
9 interoceptive processing, was modulated by conscious detection of heartbeats between focus  
10 conditions suggesting the role of top-down processes influencing insular connectivity. Due to the  
11 crucial role of multimodal information, including interoceptive, somatosensory, and proprioceptive  
12 information, in body-representation and awareness, these findings extend previous knowledge  
13 regarding the neural correlates of directed attention to internal and somatosensory stimuli and  
14 conscious as well as non-conscious processing of these sensations.

## 15 Acknowledgements

16 M.T. is supported by the European Research Council Consolidator Grant (ERC-2016-CoG-724537) to  
17 M.T. under the FP7 for the INtheSELF project, and the NOMIS foundation Distinguished Scientist  
18 Award.

## 19 Conflict of interests

20 The authors report no conflict of interests.

21



## 1   References

- 2   Andersson, J. L. R., Jenkinson, M., & Smith, S. (2010). *Non-linear registration, aka spatial*  
3       *normalisation. FMRIB Technial Report TR07JA2*. Oxford, UK.
- 4   Andrews-Hanna, J., Smallwood, J., & Spreng, R. (2014). The default network and self-generated  
5       thought: component processes, dynamic control, and clinical relevance. *Ann N Y Acad Sci.*,  
6       1316(1), 29–52. <https://doi.org/10.1016/j.biotechadv.2011.08.021>.Secreted
- 7   Arzy, S., Thut, G., Mohr, C., Michel, C. M., & Blanke, O. (2006). Neural basis of embodiment: Distinct  
8       contributions of temporoparietal junction and extrastriate body area. *Journal of Neuroscience*.  
9       <https://doi.org/10.1523/JNEUROSCI.0745-06.2006>
- 10   Aspell, J. E., Heydrich, L., Marillier, G., Lavanchy, T., Herbelin, B., & Blanke, O. (2013). Turning Body  
11       and Self Inside Out: Visualized Heartbeats Alter Bodily Self-Consciousness and Tactile  
12       Perception. *Psychological Science*, 24(12), 2445–2453.  
13       <https://doi.org/10.1177/0956797613498395>
- 14   Aspell, J. E., Lenggenhager, B., & Blanke, O. (2012). Multisensory Perception and Bodily Self-  
15       Consciousness: From Out-of-Body to Inside- Body Experience. In M. M. Murray & M. T. Wallace  
16       (Eds.), *The Neural Bases of Multisensory Processes* (pp. 467–481). CRC Press/Taylor & Francis.
- 17   Avery, J. A., Drevets, W. C., Moseman, S. E., Bodurka, J., Barcalow, J. C., & Simmons, W. K. (2014).  
18       Major Depressive Disorder Is Associated With Abnormal Interoceptive Activity and Functional  
19       Connectivity in the Insula. *Biological Psychiatry*, 76(3), 258–266.  
20       <https://doi.org/10.1016/J.BIOPSYCH.2013.11.027>
- 21   Avery, J. A., Kerr, K. L., Ingeholm, J. E., Burrows, K., Bodurka, J., & Simmons, W. K. (2015). A common  
22       gustatory and interoceptive representation in the human mid-insula. *Human Brain Mapping*,  
23       36(8), 2996–3006. <https://doi.org/10.1002/hbm.22823>
- 24   Aziz, Q., Schnitzler, A., & Enck, P. (2000). Functional neuroimaging of visceral sensation. *Journal of*  
25       *Clinical Neurophysiology*, 17, 604–612. <https://doi.org/10.1097/00004691-200011000-00006>
- 26   Bauer, C. C. C., Barrios, F. A., & Díaz, J. L. (2014). Subjective somatosensory experiences disclosed by  
27       focused attention: Cortical-hippocampal-insular and amygdala contributions. *PLoS ONE*, 9(8).  
28       <https://doi.org/10.1371/journal.pone.0104721>
- 29   Bauer, C. C. C., Díaz, J. L., Concha, L., & Barrios, F. A. (2014). Sustained attention to spontaneous  
30       thumb sensations activates brain somatosensory and other proprioceptive areas. *Brain and*  
31       *Cognition*, 87(1), 86–96. <https://doi.org/10.1016/j.bandc.2014.03.009>
- 32   Ben-Shabat, E., Matyas, T. A., Pell, G. S., Brodtmann, A., & Carey, L. M. (2015). The right  
33       supramarginal gyrus is important for proprioception in healthy and stroke-affected  
34       participants: A functional MRI study. *Frontiers in Neurology*.  
35       <https://doi.org/10.3389/fneur.2015.00248>
- 36   Björnsdotter, M., Morrison, I., & Olausson, H. W. (2010). Feeling good: On the role of C fiber  
37       mediated touch in interoception. *Experimental Brain Research*.  
38       <https://doi.org/10.1007/s00221-010-2408-y>
- 39   Blanke, O. (2012). Multisensory brain mechanisms of bodily self-consciousness. *Nature Reviews*  
40       *Neuroscience*, 13(8), 556–571. <https://doi.org/10.1038/nrn3292>
- 41   Botvinick, M., & Cohen, J. D. (1998). Rubber hand ‘feels’ what eyes see. *Nature*.
- 42   Brefczynski-Lewis, J. A., Lutz, A., Schaefer, H. S., Levinson, D. B., & Davidson, R. J. (2007). Neural  
43       correlates of attentional expertise in long-term meditation practitioners. *Proceedings of the*

- 1        *National Academy of Sciences*, 104(27), 11483–11488.  
2        <https://doi.org/10.1073/pnas.0606552104>
- 3        Briggs, R. W., Dy-Liacco, I., Malcolm, M. P., Lee, H., Peck, K. K., Gopinath, K. S., ... Tran-Son-Tay, R.  
4        (2004). A Pneumatic Vibrotactile Stimulation Device for fMRI. *Magnetic Resonance in Medicine*,  
5        51(3), 640–643. <https://doi.org/10.1002/mrm.10732>
- 6        Brozzoli, C., Gentile, G., & Henrik Ehrsson, H. (2012). That’s near my hand! Parietal and premotor  
7        coding of hand-centered space contributes to localization and self-attribution of the hand.  
8        *Journal of Neuroscience*. <https://doi.org/10.1523/JNEUROSCI.2660-12.2012>
- 9        Cameron, O. G., & Minoshima, S. (2002). Regional Brain Activation Due to Pharmacologically Induced  
10        Adrenergic Interoceptive Stimulation in Humans. *Psychosomatic Medicine*, 64(6), 851–861.  
11        <https://doi.org/10.1097/01.PSY.0000038939.33335.32>
- 12        Caseras, X., Murphy, K., Mataix-Cols, D., López-Solà, M., Soriano-Mas, C., Ortriz, H., ... Torrubia, R.  
13        (2013). Anatomical and functional overlap within the insula and anterior cingulate cortex  
14        during interoception and phobic symptom provocation. *Human Brain Mapping*, 34(5), 1220–  
15        1229. <https://doi.org/10.1002/hbm.21503>
- 16        Chakravarty, M. M., Rosa-Neto, P., Broadbent, S., Evans, A. C., & Collins, D. L. (2009). Robust S1, S2,  
17        and thalamic activations in individual subjects with vibrotactile stimulation at 1.5 and 3.0 T.  
18        *Human Brain Mapping*. <https://doi.org/10.1002/hbm.20598>
- 19        Chang, M. C., Ahn, S. H., Cho, Y. W., Son, S. M., Kwon, Y. H., Lee, M. Y., ... Jang, S. H. (2009). The  
20        comparison of cortical activation patterns by active exercise, proprioceptive input, and touch  
21        stimulation in the human brain: A functional MRI study. *NeuroRehabilitation*, 25(2), 87–92.  
22        <https://doi.org/10.3233/NRE-2009-0502>
- 23        Costantini, M., Urgesi, C., Galati, G., Romani, G. L., & Aglioti, S. M. (2011). Haptic perception and  
24        body representation in lateral and medial occipito-temporal cortices. *Neuropsychologia*.  
25        <https://doi.org/10.1016/j.neuropsychologia.2011.01.034>
- 26        Craig, A. D. (2002). How do you feel? Interoception: the sense of the physiological condition of the  
27        body. *Nature Reviews Neuroscience*, 3, 655–666. [https://doi.org/10.1016/S0959-](https://doi.org/10.1016/S0959-4388(03)00090-4)  
28        [4388\(03\)00090-4](https://doi.org/10.1016/S0959-4388(03)00090-4)
- 29        Craig, A. D. (2009). How do you feel—now? The anterior insula and human awareness. *Nat Rev*  
30        *Neurosci*, 10(JANUARY), 59–70.
- 31        Craig, A. D. (Bud). (2009). How do you feel—now? The anterior insula and human awareness. *Nature*  
32        *Reviews. Neuroscience*, 10(1), 59–70. <https://doi.org/10.1038/nrn2555>
- 33        Craig, A. D., Chen, K., Bandy, D., & Reiman, E. M. (2000). Thermosensory activation of insular cortex.  
34        *Nature Neuroscience*, 3, 184–190. <https://doi.org/10.1038/72131>
- 35        Critchley, H. D. (2002). Electrodermal responses: what happens in the brain. *The Neuroscientist : A*  
36        *Review Journal Bringing Neurobiology, Neurology and Psychiatry*, 8(2), 132–142.  
37        <https://doi.org/10.1177/107385840200800209>
- 38        Critchley, H. D. (2009). Psychophysiology of neural, cognitive and affective integration: fMRI and  
39        autonomic indicants. *International Journal of Psychophysiology*, 73(2), 88–94.  
40        <https://doi.org/10.1016/j.ijpsycho.2009.01.012>
- 41        Critchley, H. D., Corfield, D. R., Chandler, M. P., Mathias, C. J., & Dolan, R. J. (2000). Cerebral  
42        correlates of autonomic cardiovascular arousal: A functional neuroimaging investigation in  
43        humans. *Journal of Physiology*, 523, 259–270. <https://doi.org/10.1111/j.1469-7793.2000.t01-1->

- 1 00259.x
- 2 Critchley, H. D., & Garfinkel, S. N. (2017). Interoception and emotion. *Current Opinion in Psychology*,  
3 17, 7–14. <https://doi.org/10.1016/j.copsyc.2017.04.020>
- 4 Critchley, H. D., Mathias, C. J., & Dolan, R. J. (2001). Neuroanatomical basis for first-and second-  
5 order representations of bodily states. *Nature Neuroscience*, 4, 207–212.  
6 <https://doi.org/10.1038/84048>
- 7 Critchley, H. D., Mathias, C. J., & Dolan, R. J. (2002). Fear conditioning in humans: The influence of  
8 awareness and autonomic arousal on functional neuroanatomy. *Neuron*, 33, 653–663.  
9 [https://doi.org/10.1016/S0896-6273\(02\)00588-3](https://doi.org/10.1016/S0896-6273(02)00588-3)
- 10 Critchley, H. D., Mathias, C. J., Josephs, O., O’Doherty, J., Zanini, S., Dewar, B. K., ... Dolan, R. J.  
11 (2003). Human cingulate cortex and autonomic control: Converging neuroimaging and clinical  
12 evidence. *Brain*, 126(10), 2139–2152. <https://doi.org/10.1093/brain/awg216>
- 13 Critchley, H. D., Wiens, S., Rotshtein, P., Ohman, A., & Dolan, R. J. (2004). Neural systems supporting  
14 interoceptive awareness. *Nat Neurosci.*, 7(2), 189–195. <https://doi.org/10.1038/nn1176>
- 15 Crucianelli, L., Krahé, C., Jenkinson, P. M., & Fotopoulou, A. (Katerina). (2018). Interoceptive  
16 ingredients of body ownership: Affective touch and cardiac awareness in the rubber hand  
17 illusion. *Cortex*, 104, 180–192. <https://doi.org/10.1016/j.cortex.2017.04.018>
- 18 D’Argembeau, A., Collette, F., Van Der Linden, M., Laureys, S., Del Fiore, G., Degueldre, C., ... Salmon,  
19 E. (2005). Self-referential reflective activity and its relationship with rest: A PET study.  
20 *NeuroImage*, 25(2), 616–624. <https://doi.org/10.1016/j.neuroimage.2004.11.048>
- 21 Desikan, R. S., Ségonne, F., Fischl, B., Quinn, B. T., Dickerson, B. C., Blacker, D., ... Killiany, R. J. (2006).  
22 An automated labeling system for subdividing the human cerebral cortex on MRI scans into  
23 gyral based regions of interest. *NeuroImage*, 31(3), 968–980.  
24 <https://doi.org/10.1016/j.neuroimage.2006.01.021>
- 25 Doll, A., Hölzel, B. K., Mulej Bratec, S., Boucard, C. C., Xie, X., Wohlschläger, A. M., & Sorg, C. (2016).  
26 Mindful attention to breath regulates emotions via increased amygdala-prefrontal cortex  
27 connectivity. *NeuroImage*, 134, 305–313. <https://doi.org/10.1016/j.neuroimage.2016.03.041>
- 28 Ehrsson, H. H. (2012). The concept of body ownership and its relation to multisensory integration. In  
29 B. E. Stein (Ed.), *The New Handbook of Multisensory Processes* (pp. 775–792). Cambridge: MIT  
30 Press.
- 31 Farb, N. A. S., Segal, Z. V., & Anderson, A. K. (2013). Attentional modulation of primary interoceptive  
32 and exteroceptive cortices. *Cerebral Cortex*, 23(1), 114–126.  
33 <https://doi.org/10.1093/cercor/bhr385>
- 34 Frazier, J. A., Chiu, S., Breeze, J. L., Makris, N., Lange, N., Kennedy, D. N., ... Biederman, J. (2005).  
35 Structural brain magnetic resonance imaging of limbic and thalamic volumes in pediatric  
36 bipolar disorder. *American Journal of Psychiatry*, 162(7), 1256–1265.  
37 <https://doi.org/10.1176/appi.ajp.162.7.1256>
- 38 Garfinkel, S. N., & Critchley, H. D. (2016). Threat and the Body: How the Heart Supports Fear  
39 Processing. *Trends in Cognitive Sciences*. <https://doi.org/10.1016/j.tics.2015.10.005>
- 40 Golaszewski, S. M., Siedentopf, C. M., Koppelstaetter, F., Fend, M., Ischebeck, A., Gonzalez-Felipe, V.,  
41 ... Gerstenbrand, F. (2006). Human brain structures related to plantar vibrotactile stimulation: A  
42 functional magnetic resonance imaging study. *NeuroImage*, 29(3), 923–929.  
43 <https://doi.org/10.1016/j.neuroimage.2005.08.052>

- 1 Gusnard, D. A., & Raichle, M. E. (2001). Searching for a baseline: functional imaging and the resting  
2 human brain. *Nat Rev Neurosci.*, 2, 685–694. <https://doi.org/10.1038/35094500>
- 3 Guterstam, A., Björnsdotter, M., Gentile, G., & Ehrsson, H. H. (2015). Posterior cingulate cortex  
4 integrates the senses of self-location and body ownership. *Current Biology*.  
5 <https://doi.org/10.1016/j.cub.2015.03.059>
- 6 Jenkinson, M., Bannister, P., Brady, M., & Smith, S. (2002). Improved optimization for the robust and  
7 accurate linear registration and motion correction of brain images. *NeuroImage*, 17(2), 825–  
8 841. [https://doi.org/10.1016/S1053-8119\(02\)91132-8](https://doi.org/10.1016/S1053-8119(02)91132-8)
- 9 Jenkinson, M., Beckmann, C. F., Behrens, T. E. J., Woolrich, M. W., & Smith, S. M. (2012). FSL.  
10 *NeuroImage*, 62(2), 782–790. <https://doi.org/10.1016/J.NEUROIMAGE.2011.09.015>
- 11 Jenkinson, M., & Smith, S. (2001). A global optimisation method for robust affine registration of  
12 brain images. *Medical Image Analysis*, 5(2), 143–156.  
13 [https://doi.org/https://doi.org/10.1016/S1361-8415\(01\)00036-6](https://doi.org/https://doi.org/10.1016/S1361-8415(01)00036-6)
- 14 Jiang, J., Beck, J., Heller, K., & Egner, T. (2015). An insula-frontostriatal network mediates flexible  
15 cognitive control by adaptively predicting changing control demands. *Nature Communications*,  
16 6(May). <https://doi.org/10.1038/ncomms9165>
- 17 Khalsa, S. S., Adolphs, R., Cameron, O. G., Critchley, H. D., Davenport, P. W., Feinstein, J. S., ... Paulus,  
18 M. P. (2018). Interoception and Mental Health: a Roadmap. *Biological Psychiatry: Cognitive  
19 Neuroscience and Neuroimaging*, 3(6), 501–513. <https://doi.org/10.1016/j.bpsc.2017.12.004>
- 20 Khalsa, S. S., Rudrauf, D., Feinstein, J. S., & Tranel, D. (2009). The pathways of interoceptive  
21 awareness. *Nature Neuroscience*, 12(12), 1494–1496. <https://doi.org/10.1038/nn.2411>
- 22 Kikuchi, M., Takahashi, T., Hirose, T., Oboshi, Y., Yoshikawa, E., Minabe, Y., & Ouchi, Y. (2017). The  
23 Lateral Occipito-temporal Cortex Is Involved in the Mental Manipulation of Body Part Imagery.  
24 *Frontiers in Human Neuroscience*, 11, 181. <https://doi.org/10.3389/fnhum.2017.00181>
- 25 Kuehn, E., Mueller, K., Lohmann, G., & Schuetz-Bosbach, S. (2016). Interoceptive awareness changes  
26 the posterior insula functional connectivity profile. *Brain Structure and Function*, 221(3), 1555–  
27 1571. <https://doi.org/10.1007/s00429-015-0989-8>
- 28 Liljencrantz, J., & Olausson, H. W. (2014). Tactile C fibers and their contributions to pleasant  
29 sensations and to tactile allodynia. *Frontiers in Behavioral Neuroscience*, 8(MAR), 6–11.  
30 <https://doi.org/10.3389/fnbeh.2014.00037>
- 31 Limanowski, J., Lutti, A., & Blankenburg, F. (2014). The extrastriate body area is involved in illusory  
32 limb ownership. *NeuroImage*. <https://doi.org/10.1016/j.neuroimage.2013.10.035>
- 33 Lou, H. C., Luber, B., Crupain, M., Keenan, J. P., Nowak, M., Kjaer, T. W., ... Lisanby, S. H. (2004).  
34 Parietal cortex and representation of the mental Self. *Proceedings of the National Academy of  
35 Sciences of the United States of America*. <https://doi.org/10.1073/pnas.0400049101>
- 36 Makris, N., Goldstein, J. M., Kennedy, D., Hodge, S. M., Caviness, V. S., Faraone, S. V., ... Seidman, L. J.  
37 (2006). Decreased volume of left and total anterior insular lobule in schizophrenia.  
38 *Schizophrenia Research*, 83(2–3), 155–171. <https://doi.org/10.1016/j.schres.2005.11.020>
- 39 Mason, M. F., Norton, M. I., Van Horn, J. D., Wegner, D. M., Grafton, S. T., & Macrae, C. N. (2007).  
40 Wandering minds: the default network and stimulus-independent thought. *Science*, 315(5810),  
41 393–395. <https://doi.org/10.1126/science.1131295>
- 42 McLaren, D. G., Ries, M. L., Xu, G., & Johnson, S. C. (2012a). A generalized form of context-  
43 dependent psychophysiological interactions (gPPI): A comparison to standard approaches.

- 1        *NeuroImage*, 61(4), 1277–1286. <https://doi.org/10.1016/J.NEUROIMAGE.2012.03.068>
- 2        McLaren, D. G., Ries, M. L., Xu, G., & Johnson, S. C. (2012b). A generalized form of context-  
3        dependent psychophysiological interactions (gPPI): A comparison to standard approaches.  
4        *NeuroImage*, 61(4), 1277–1286. <https://doi.org/10.1016/j.neuroimage.2012.03.068>
- 5        Meneguzzo, P., Tsakiris, M., Schioth, H. B., Stein, D. J., & Brooks, S. J. (2014). Subliminal versus  
6        supraliminal stimuli activate neural responses in anterior cingulate cortex, fusiform gyrus and  
7        insula: a meta-analysis of fMRI studies. *BMC Psychology*, 2(1). [https://doi.org/10.1186/s40359-](https://doi.org/10.1186/s40359-014-0052-1)  
8        014-0052-1
- 9        Menon, V., & Uddin, L. Q. (2010). Saliency, switching, attention and control: a network model of  
10        insula function. *Brain Structure & Function*, 214(5–6), 655–667.  
11        <https://doi.org/10.1007/s00429-010-0262-0>
- 12        Nelson, A. J., Staines, W. R., Graham, S. J., & McIlroy, W. E. (2004). Activation in SI and SII; the  
13        influence of vibrotactile amplitude during passive and task-relevant stimulation. *Cognitive Brain*  
14        *Research*, 19(2), 174–184. <https://doi.org/10.1016/J.COGBRAINRES.2003.11.013>
- 15        Nichols, T., Brett, M., Andersson, J., Wager, T., & Poline, J.-B. (2005). Valid conjunction inference  
16        with the minimum statistic. *NeuroImage*, 25(3), 653–660.  
17        <https://doi.org/10.1016/J.NEUROIMAGE.2004.12.005>
- 18        O’Reilly, J. X., Woolrich, M. W., Behrens, T. E. J., Smith, S. M., & Johansen-Berg, H. (2012). Tools of  
19        the trade: Psychophysiological interactions and functional connectivity. *Social Cognitive and*  
20        *Affective Neuroscience*, 7(5), 604–609. <https://doi.org/10.1093/scan/nss055>
- 21        Olausson, H. W., Cole, J., Vallbo, Å., McGlone, F., Elam, M., Krämer, H. H., ... Bushnell, M. C. (2008).  
22        Unmyelinated tactile afferents have opposite effects on insular and somatosensory cortical  
23        processing. *Neuroscience Letters*. <https://doi.org/10.1016/j.neulet.2008.03.015>
- 24        Olausson, H. W., Lamarre, Y., Backlund, H., Morin, C., Wallin, B. G., Starck, G., ... Bushnell, M. C.  
25        (2002). Unmyelinated tactile afferents signal touch and project to insular cortex. *Nature*  
26        *Neuroscience*. <https://doi.org/10.1038/nn896>
- 27        Park, H. D., & Blanke, O. (2019). Coupling Inner and Outer Body for Self-Consciousness. *Trends in*  
28        *Cognitive Sciences*, 23(5), 377–388. <https://doi.org/10.1016/j.tics.2019.02.002>
- 29        Peyron, R., Frot, M., Schneider, F., Garcia-Larrea, L., Mertens, P., Barral, F. G., ... Mauguière, F.  
30        (2002). Role of operculoinsular cortices in human pain processing: Converging evidence from  
31        PET, fMRI, dipole modeling, and intracerebral recordings of evoked potentials. *NeuroImage*,  
32        1336–1346. <https://doi.org/10.1006/nimg.2002.1315>
- 33        Phan, K. L., Wager, T., Taylor, S. F., & Liberzon, I. (2002). Functional neuroanatomy of emotion: a  
34        meta-analysis of emotion activation studies in PET and fMRI. *NeuroImage*, 16(2), 331–348.  
35        <https://doi.org/10.1006/nimg.2002.1087>
- 36        Plailly, J., Radnovich, A. J., Sabri, M., Royet, J. P., & Kareken, D. A. (2007). Involvement of the left  
37        anterior insula and frontopolar gyrus in odor discrimination. *Human Brain Mapping*, 28(5),  
38        363–372. <https://doi.org/10.1002/hbm.20290>
- 39        Pollatos, O., Schandry, R., Auer, D. P., & Kaufmann, C. (2007a). Brain structures mediating  
40        cardiovascular arousal and interoceptive awareness. *Brain Research*, 1141(1), 178–187.  
41        <https://doi.org/10.1016/j.brainres.2007.01.026>
- 42        Pollatos, O., Schandry, R., Auer, D. P., & Kaufmann, C. (2007b). Brain structures mediating  
43        cardiovascular arousal and interoceptive awareness. *Brain Research*, 1141(1), 178–187.

- 1 <https://doi.org/10.1016/j.brainres.2007.01.026>
- 2 Ponzio, S., Kirsch, L. P., Fotopoulou, A., & Jenkinson, P. M. (2018). Balancing body ownership: Visual  
3 capture of proprioception and affectivity during vestibular stimulation. *Neuropsychologia*, *117*,  
4 311–321. <https://doi.org/10.1016/j.neuropsychologia.2018.06.020>
- 5 Quadt, L., Critchley, H. D., & Garfinkel, S. N. (2018). Interoception and emotion: Shared mechanisms  
6 and clinical implications. In M. Tsakiris & H. De Preester (Eds.), *The Interoceptive Mind: From*  
7 *Homeostasis to Awareness* (pp. 123–143). Oxford, UK: Oxford University Press.  
8 <https://doi.org/10.1093/oso/9780198811930.001.0001>
- 9 R Studio Team. (2016). RStudio: Integrated development environment for R. *RStudio, Inc.* R Studio,  
10 Inc. <https://doi.org/10.1002/jwmg.232>
- 11 Raichle, M. E., MacLeod, A. M., Snyder, A. Z., Powers, W. J., Gusnard, D. A., & Shulman, G. L. (2001).  
12 A default mode of brain function. *Proc Natl Acad Sci U S A*, *98*(2), 676–682.  
13 <https://doi.org/10.1073/pnas.98.2.676>
- 14 Rolls, E. T. (2015). Taste, olfactory, and food reward value processing in the brain. *Progress in*  
15 *Neurobiology*, *127–128*, 64–90. <https://doi.org/10.1016/j.pneurobio.2015.03.002>
- 16 Roudaut, Y., Lonigro, A., Coste, B., Hao, J., Delmas, P., & Crest, M. (2012). Touch sense: functional  
17 organization and molecular determinants of mechanosensitive receptors. *Channels (Austin,*  
18 *Tex.)*, *6*(4), 234–245. <https://doi.org/10.4161/chan.22213>
- 19 Salvato, G., Richter, F., Sedeño, L., Bottini, G., & Paulesu, E. (2019). Building the bodily self-  
20 awareness: Evidence for the convergence between interoceptive and exteroceptive  
21 information in a multilevel kernel density analysis study. *Human Brain Mapping*, (September),  
22 1–18. <https://doi.org/10.1002/hbm.24810>
- 23 Schandry, R. (1981). Heartbeat perception and emotional experience. *Psychophysiology*, *18*(4), 483–  
24 488.
- 25 Schulz, S. M. (2016). Neural correlates of heart-focused interoception: A functional magnetic  
26 resonance imaging meta-analysis. *Philosophical Transactions of the Royal Society B: Biological*  
27 *Sciences*, *371*(1708). <https://doi.org/10.1098/rstb.2016.0018>
- 28 Seeley, W. W., Menon, V., Schatzberg, A. F., Keller, J., Glover, G. H., Kenna, H., ... Greicius, M. D.  
29 (2007). Dissociable intrinsic connectivity networks for salience processing and executive  
30 control. *J Neurosci.*, *27*(9), 2349–2356. <https://doi.org/10.1523/JNEUROSCI.5587-06.2007>
- 31 Seghier, M. L. (2013). The angular gyrus: Multiple functions and multiple subdivisions.  
32 *Neuroscientist*, *19*(1), 43–61. <https://doi.org/10.1177/1073858412440596>
- 33 Sel, A., Azevedo, R. T., & Tsakiris, M. (2017). Heartfelt Self: Cardio-Visual Integration Affects Self-Face  
34 Recognition and Interoceptive Cortical Processing. *Cerebral Cortex*, *27*(11), 5144–5155.  
35 <https://doi.org/10.1093/cercor/bhw296>
- 36 Shafritz, K. M., Collins, S. H., & Blumberg, H. P. (2006). The interaction of emotional and cognitive  
37 neural systems in emotionally guided response inhibition. *NeuroImage*, *31*(1), 468–475.  
38 <https://doi.org/10.1016/j.neuroimage.2005.11.053>
- 39 Simmons, W. K., Avery, J. A., Barcalow, J. C., Bodurka, J., Drevets, W. C., & Bellgowan, P. (2013).  
40 Keeping the body in mind: Insula functional organization and functional connectivity integrate  
41 interoceptive, exteroceptive, and emotional awareness. *Human Brain Mapping*, *34*(11), 2944–  
42 2958. <https://doi.org/10.1002/hbm.22113>
- 43 Smejkal, V., Druga, R., & Tintera, J. (2003). Olfactory activity in the human brain identified by fMRI.

- 1            *Bratislavské Lekárske Listy*, 104(6), 184–188.
- 2     Smith, S. M. (2002). Fast robust automated brain extraction. *Human Brain Mapping*.  
3            <https://doi.org/10.1002/hbm.10062>
- 4     Stern, E. R., Grimaldi, S. J., Muratore, A., Murrrough, J., Leibu, E., Fleysher, L., ... Burdick, K. E. (2017).  
5            Neural correlates of interoception: Effects of interoceptive focus and relationship to  
6            dimensional measures of body awareness. *Human Brain Mapping*, 38(12), 6068–6082.  
7            <https://doi.org/10.1002/hbm.23811>
- 8     Stone, K. D., Keizer, A., & Dijkerman, H. C. (2018). The influence of vision, touch, and proprioception  
9            on body representation of the lower limbs. *Acta Psychologica*, 185, 22–32.  
10           <https://doi.org/10.1016/j.actpsy.2018.01.007>
- 11    Suzuki, K., Garfinkel, S. N., Critchley, H. D., & Seth, A. K. (2013). Multisensory integration across  
12            exteroceptive and interoceptive domains modulates self-experience in the rubber-hand  
13            illusion. *Neuropsychologia*, 51(13), 2909–2917.  
14            <https://doi.org/10.1016/j.neuropsychologia.2013.08.014>
- 15    Suzuki, Y., Critchley, H. D., Suckling, J., Fukuda, R., Williams, S. C., Andrew, C., ... Jackson, S. H. (2001).  
16            Functional magnetic resonance imaging of odor identification: the effect of aging. *The Journals*  
17            *of Gerontology. Series A, Biological Sciences and Medical Sciences*, 56(12), M756–M760.  
18            <https://doi.org/10.1093/gerona/56.12.M756>
- 19    Talati, A., & Hirsch, J. (2005). Functional specialization within the medial frontal gyrus for perceptual  
20            go/no-go decisions based on “what,” “when,” and “where” related information: an fMRI study.  
21            *Journal of Cognitive Neuroscience*, 17(7), 981–993.  
22            <https://doi.org/10.1162/0898929054475226>
- 23    Taylor, J. C., Wiggett, A. J., & Downing, P. E. (2007). Functional MRI analysis of body and body part  
24            representations in the extrastriate and fusiform body areas. *Journal of Neurophysiology*.  
25            <https://doi.org/10.1152/jn.00012.2007>
- 26    Terasawa, Y., Shibata, M., Moriguchi, Y., & Umeda, S. (2013). Anterior insular cortex mediates bodily  
27            sensibility and social anxiety. *Social Cognitive and Affective Neuroscience*, 8(3), 259–266.  
28            <https://doi.org/10.1093/scan/nss108>
- 29    Tsakiris, M. (2010). My body in the brain: A neurocognitive model of body-ownership.  
30            *Neuropsychologia*, 48(3), 703–712. <https://doi.org/10.1016/j.neuropsychologia.2009.09.034>
- 31    Tsakiris, M. (2017). The multisensory basis of the self: From body to identity to others. *Quarterly*  
32            *Journal of Experimental Psychology*, 70(4), 597–609.  
33            <https://doi.org/10.1080/17470218.2016.1181768>
- 34    Tsakiris, M., & Haggard, P. (2005). The rubber hand illusion revisited: Visuotactile integration and  
35            self-attribution. *Journal of Experimental Psychology: Human Perception and Performance*,  
36            31(1), 80–91. <https://doi.org/10.1037/0096-1523.31.1.80>
- 37    Tsakiris, M., Tajadura-Jiménez, A., & Costantini, M. (2011). Just a heartbeat away from one’s  
38            body: Interoceptive sensitivity predicts malleability of body-representations. *Proceedings of the*  
39            *Royal Society B: Biological Sciences*. <https://doi.org/10.1098/rspb.2010.2547>
- 40    Uddin, L. Q. (2015). Salience processing and insular cortical function and dysfunction. *Nat Rev*  
41            *Neurosci*, 16(1), 55–61. Retrieved from <http://dx.doi.org/10.1038/nrn3857>
- 42    Urgesi, C., Candidi, M., Ionta, S., & Aglioti, S. M. (2007). Representation of body identity and body  
43            actions in extrastriate body area and ventral premotor cortex. *Nature Neuroscience*.

- 1 <https://doi.org/10.1038/nn1815>
- 2 Wang, X., Wu, Q., Egan, L., Gu, X., Liu, P., Gu, H., ... Fan, J. (2019). Anterior insular cortex plays a  
3 critical role in interoceptive attention. *ELife*, *8*, e42265. <https://doi.org/10.7554/elife.42265>
- 4 Weber, B. J., & Huettel, S. A. (2008). The neural substrates of probabilistic and intertemporal  
5 decision making. *Brain Research*, *1234*, 104–115.  
6 <https://doi.org/10.1016/j.brainres.2008.07.105>
- 7 Whitehead, W. E., Drescher, V. M., Heiman, P., & Blackwell, B. (1977). Relation of heart rate control  
8 to heartbeat perception. *Biofeedback and Self-Regulation*.  
9 <https://doi.org/10.1007/BF00998623>
- 10 Wicker, B., Keysers, C., Plailly, J., Royet, J. P., Gallese, V., & Rizzolatti, G. (2003). Both of us disgusted  
11 in My insula: The common neural basis of seeing and feeling disgust. *Neuron*, *40*(3), 655–664.  
12 [https://doi.org/10.1016/S0896-6273\(03\)00679-2](https://doi.org/10.1016/S0896-6273(03)00679-2)
- 13 Wiebking, C., Bauer, A., De Greck, M., Duncan, N. W., Tempelmann, C., & Northoff, G. (2010).  
14 Abnormal body perception and neural activity in the insula in depression: An fMRI study of the  
15 depressed “material me.” *World Journal of Biological Psychiatry*, *11*(3), 538–549.  
16 <https://doi.org/10.3109/15622970903563794>
- 17 Wiebking, C., de Greck, M., Duncan, N. W., Heinzl, A., Tempelmann, C., & Northoff, G. (2011). Are  
18 emotions associated with activity during rest or interoception? An exploratory fMRI study in  
19 healthy subjects. *Neuroscience Letters*, *491*(1), 87–92.  
20 <https://doi.org/10.1016/j.neulet.2011.01.012>
- 21 Wiebking, C., & Northoff, G. (2015). Neural activity during interoceptive awareness and its  
22 associations with alexithymia—An fMRI study in major depressive disorder and non-psychiatric  
23 controls. *Frontiers in Psychology*, *6*(589), 1–16. <https://doi.org/10.3389/fpsyg.2015.00589>
- 24 Wilbertz, T., Deserno, L., Horstmann, A., Neumann, J., Villringer, A., Heinze, H.-J., ... Schlagenhaut, F.  
25 (2014). Response inhibition and its relation to multidimensional impulsivity. *NeuroImage*, *103*,  
26 241–248. <https://doi.org/10.1016/j.neuroimage.2014.09.021>
- 27 Woolrich, M. W., Behrens, T. E. J., Beckmann, C. F., Jenkinson, M., & Smith, S. M. (2004). Multilevel  
28 linear modelling for FMRI group analysis using Bayesian inference. *NeuroImage*.  
29 <https://doi.org/10.1016/j.neuroimage.2003.12.023>
- 30 Woolrich, M. W., Ripley, B. D., Brady, M., & Smith, S. M. (2001). Temporal autocorrelation in  
31 univariate linear modeling of FMRI data. *NeuroImage*. <https://doi.org/10.1006/nimg.2001.0931>
- 32 Worsley, K. J. (2001). Statistical analysis of activation images. In P. Jezzard, P. M. Matthews, & S. M.  
33 Smith (Eds.), *Functional Magnetic Resonance Imaging: An Introduction to Methods*. OUP.  
34 <https://doi.org/10.1093/acprof:oso/9780192630711.003.0014>
- 35 Zaki, J., Davis, J. I., & Ochsner, K. N. (2012a). Overlapping activity in anterior insula during  
36 interoception and emotional experience. *NeuroImage*, *62*(1), 493–499.  
37 <https://doi.org/10.1016/j.neuroimage.2012.05.012>
- 38 Zaki, J., Davis, J. I., & Ochsner, K. N. (2012b). Overlapping activity in anterior insula during  
39 interoception and emotional experience. *NeuroImage*, *62*(1), 493–499.  
40 <https://doi.org/10.1016/J.NEUROIMAGE.2012.05.012>

41

42
